# Supplementary material for: Enantioselective Michael addition of 2-hydroxy-1,4-naphthoquinone and 1,3-dicarbonyls to β-nitroalkenes catalyzed by a novel bifunctional rosin-indane amine thiourea catalyst
Source: Royal Society of Chemistry journal article supplement (doi:10.1039/c3ra40965a), 2013-01-01
Supplement: c3ra40965a.pdf [file c3ra40965a.pdf]

## Supporting Information

### **Enantioselective Michael addition of 2-hydroxy-1,4-naphthoquinone and 1,3-dicarbonyls to nitroalkenes catalyzed by a novel bifunctional rosin-derived indane amine thiourea catalyst**

**B. V. Subba Reddy,\* Manisha Swain, S. Madhusudana Reddy, J. S. Yadav**

*Natural Product Chemistry, Indian Institute of Chemical Technology, Uppal Road, Tarnaka, Hyderabad, 500670, India.*

*E-mail: [basireddy@iict.res.in](mailto:basireddy@iict.res.in) Fax: (+)91 40 27160512.*

#### **Table of contents**

|                                                                                    |         |
|------------------------------------------------------------------------------------|---------|
| 1. General Remarks                                                                 | S2      |
| 2. Copies of <sup>1</sup> H and <sup>13</sup> C NMR spectra of Catalysts           | S3-S10  |
| 3. Copies of <sup>1</sup> H and <sup>13</sup> C NMR spectra of unreported products | S11-S19 |
| 4. HPLC Data of the products (3a-3v), (7a-7k) and (9a-9c)                          | S20-S53 |

## General Remarks

The solvent dichloromethane was dried according to a standard literature procedure. The reactions were performed in oven-dried single necked round bottom tube under an argon atmosphere. Glass syringes were used to transfer the solvent. The products were purified by column chromatography on silica gel of 60–120 or 100-200 mesh. Thin layer chromatographic plates were visualized by the ultraviolet light and/or by exposure to iodine vapours and/or by exposure to methanolic acidic solution of *p*-anisaldehyde followed by heating (<1 min) on a hot plate (~250 °C). Organic solutions were concentrated on rotary evaporator at 35–40 °C. IR spectra were recorded on FT-IR spectrometer. <sup>1</sup>H and <sup>13</sup>C NMR spectra were recorded in CDCl<sub>3</sub> using 300, 400, 500 or 600 MHz NMR spectrometers. The chemical shifts (δ) were reported in parts per million (ppm) with respect to TMS as an internal standard. The coupling constants (*J*) are quoted in Hertz (Hz). Mass spectra were recorded on mass spectrometer by Electrospray ionization (ESI) or Atmospheric pressure chemical ionization (APCI) technique.

## 2. Copies of $^1\text{H}$ and $^{13}\text{C}$ NMR spectra of Catalysts:

$^1\text{H}$  and  $^{13}\text{C}$  spectra of Ligand **III**

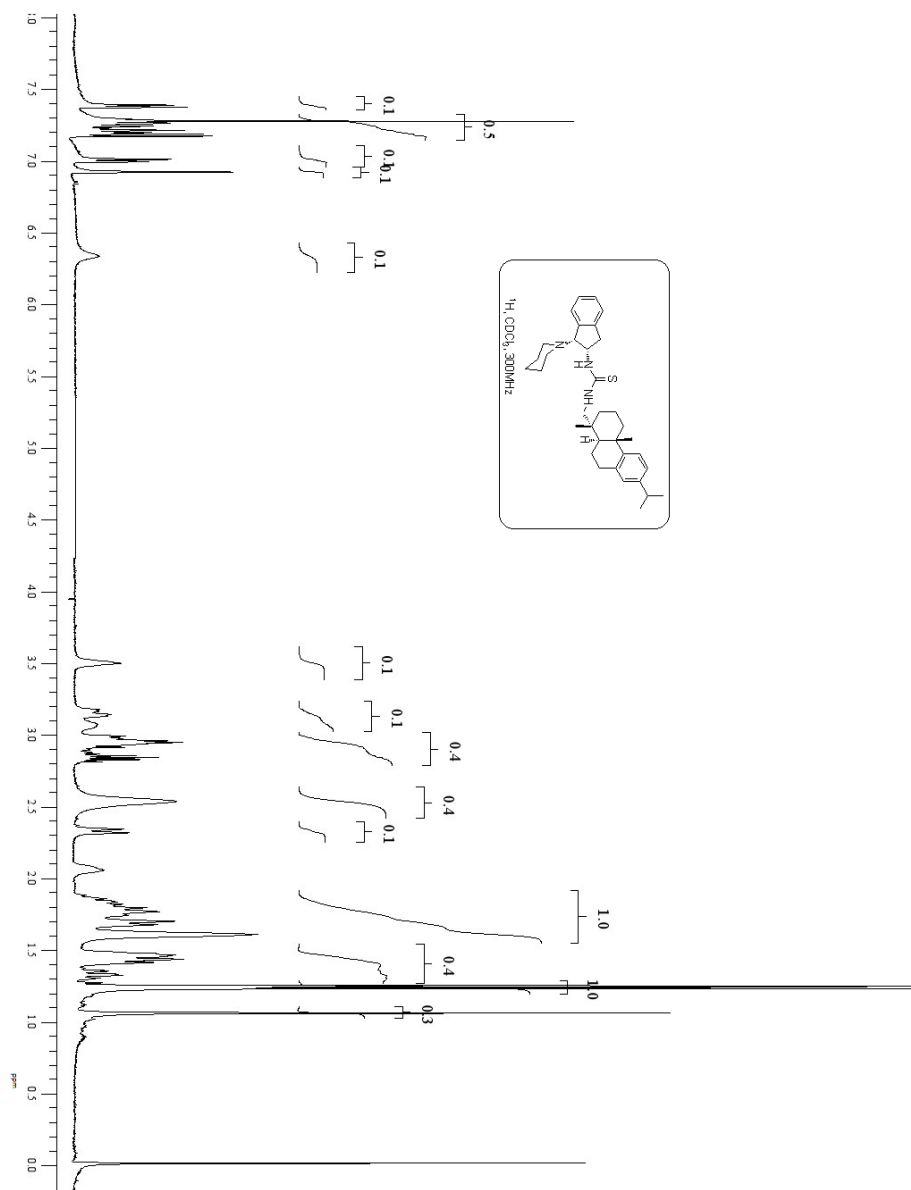

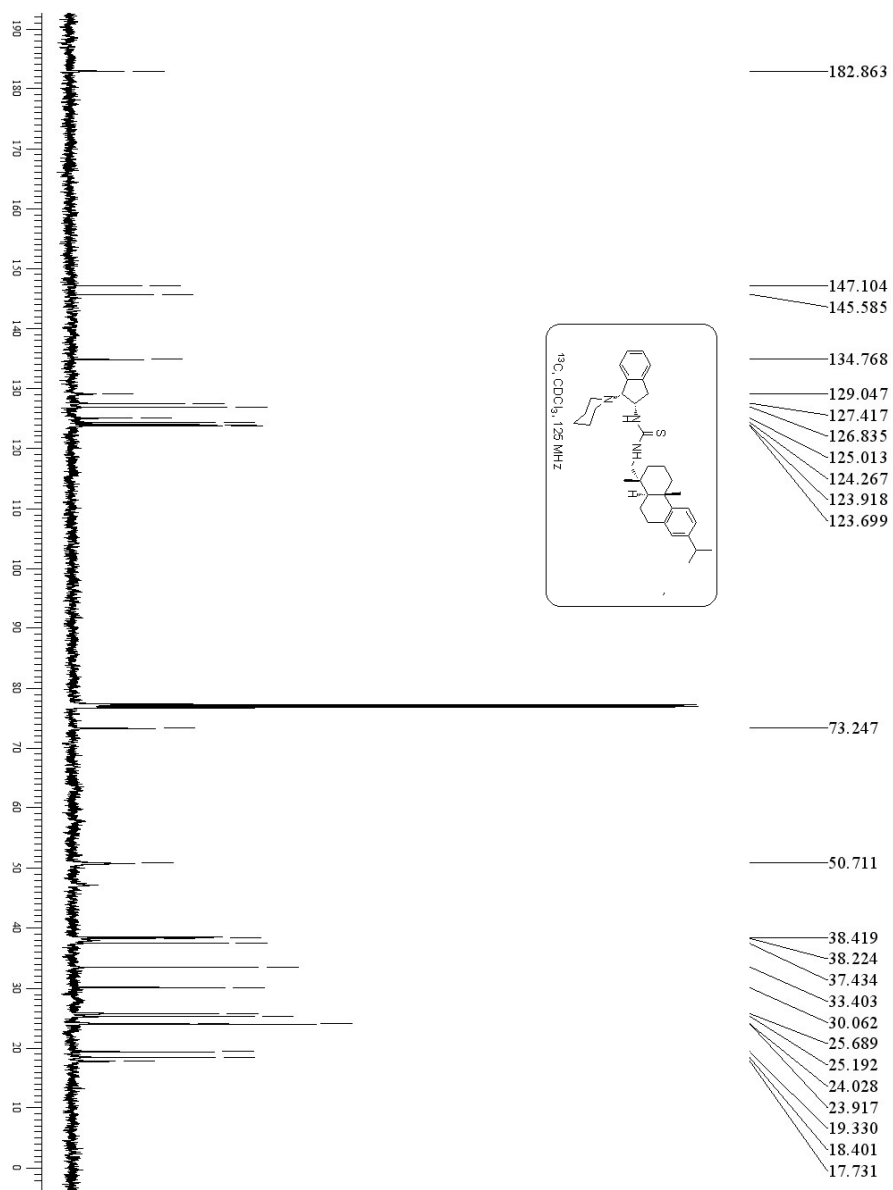

$^1\text{H}$  and  $^{13}\text{C}$  spectra of Ligand VI

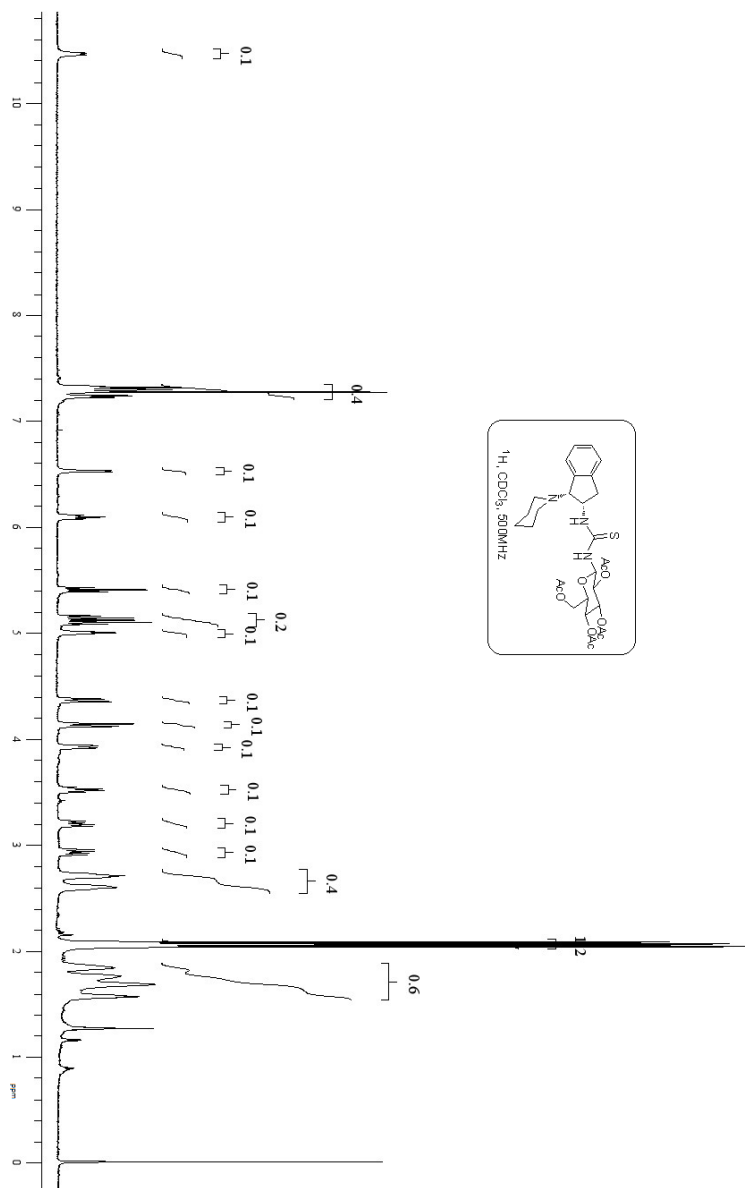

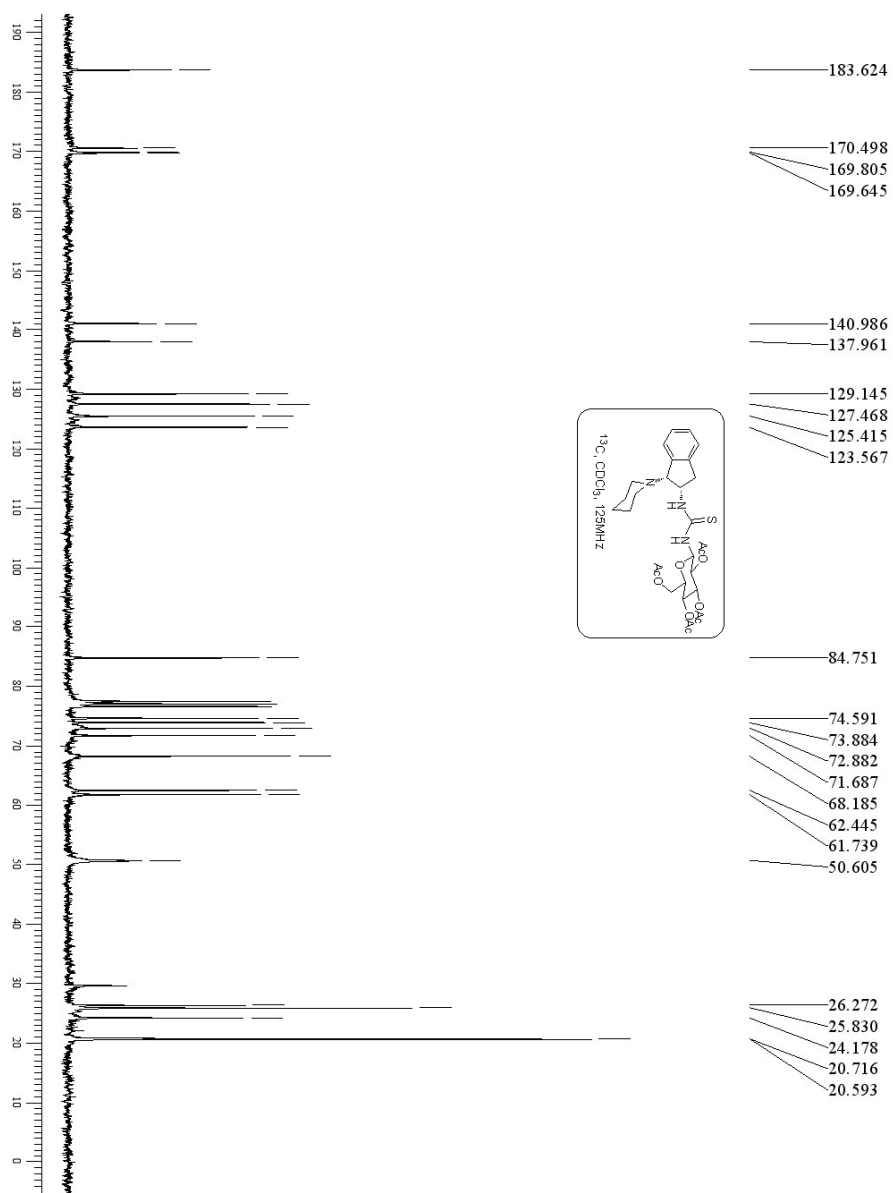

$^1\text{H}$  and  $^{13}\text{C}$  spectra of Ligand V

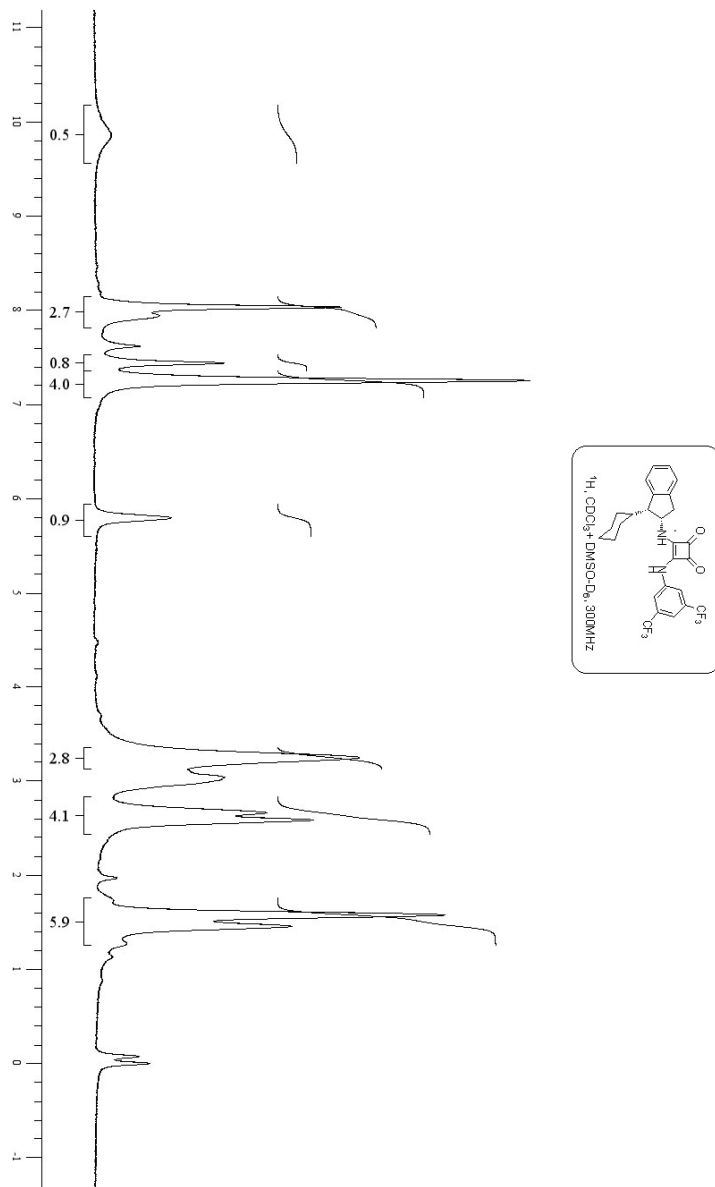

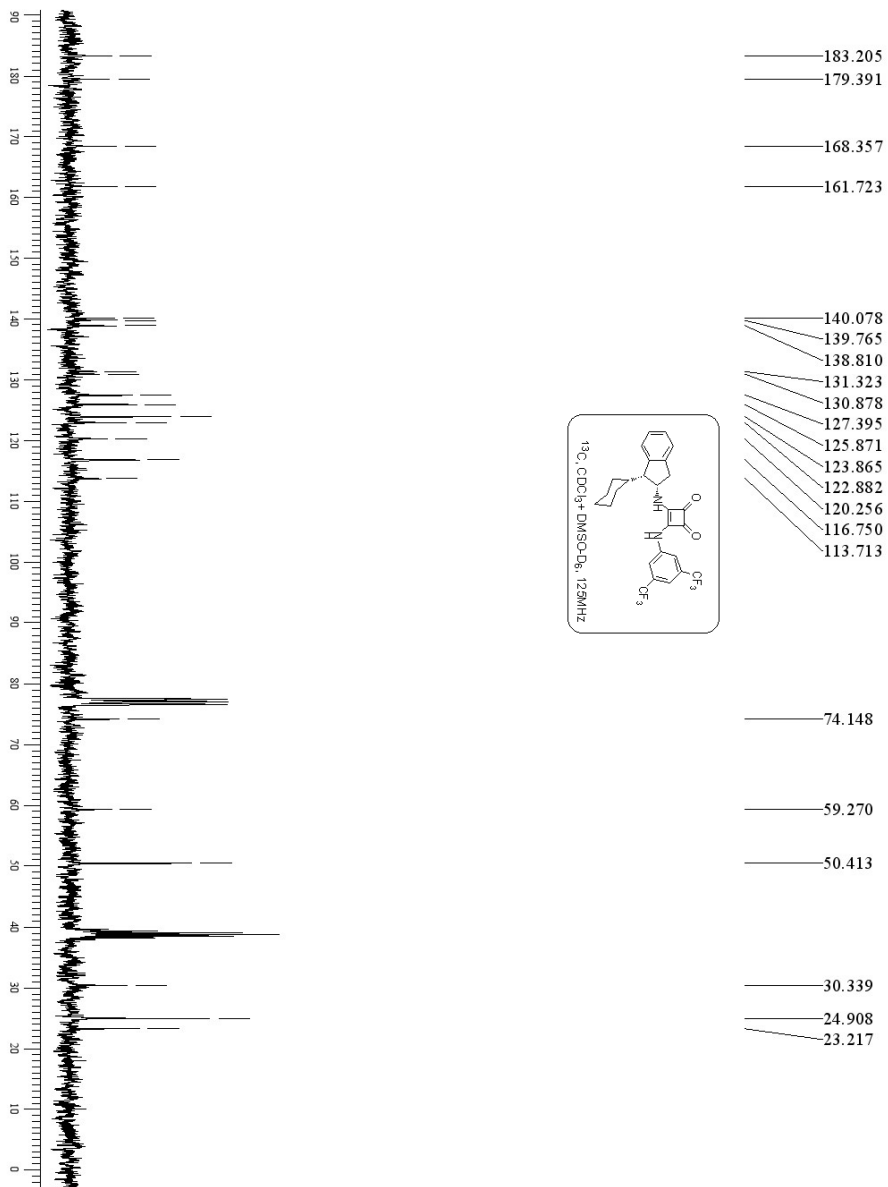



$^1\text{H}$  and  $^{13}\text{C}$  spectra of Ligand VI

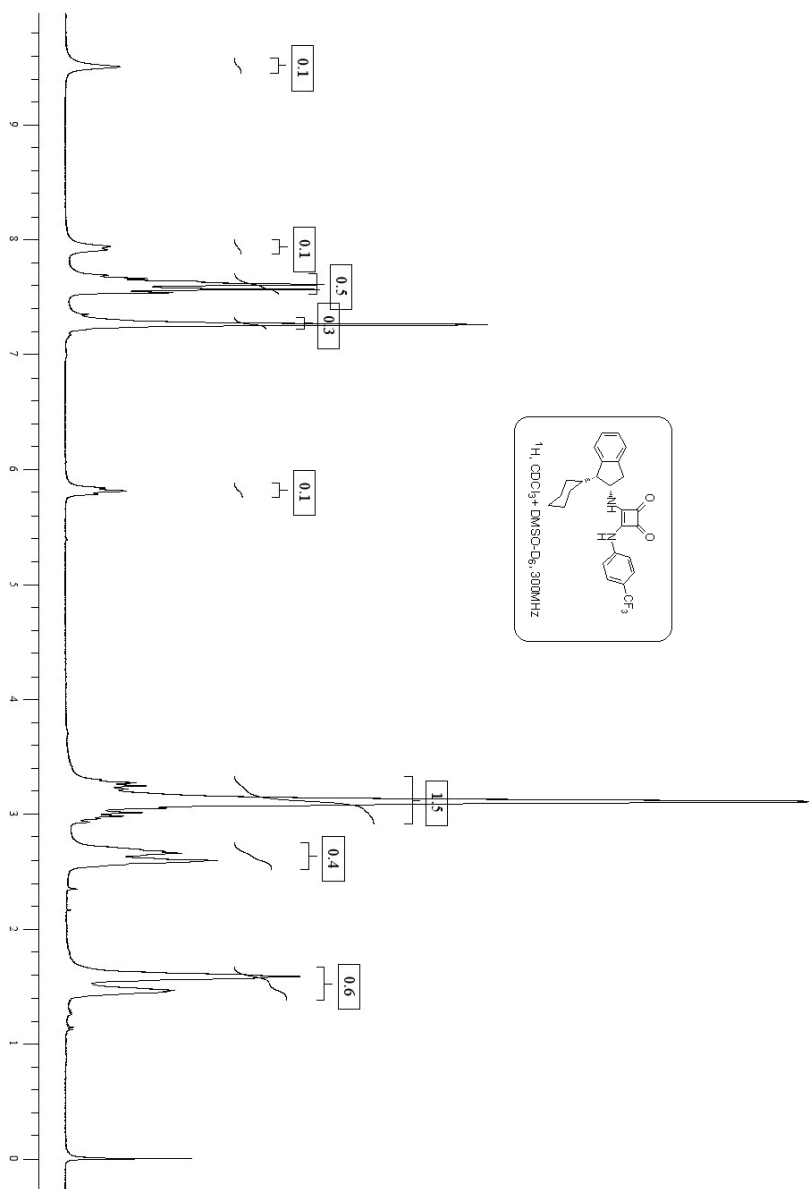

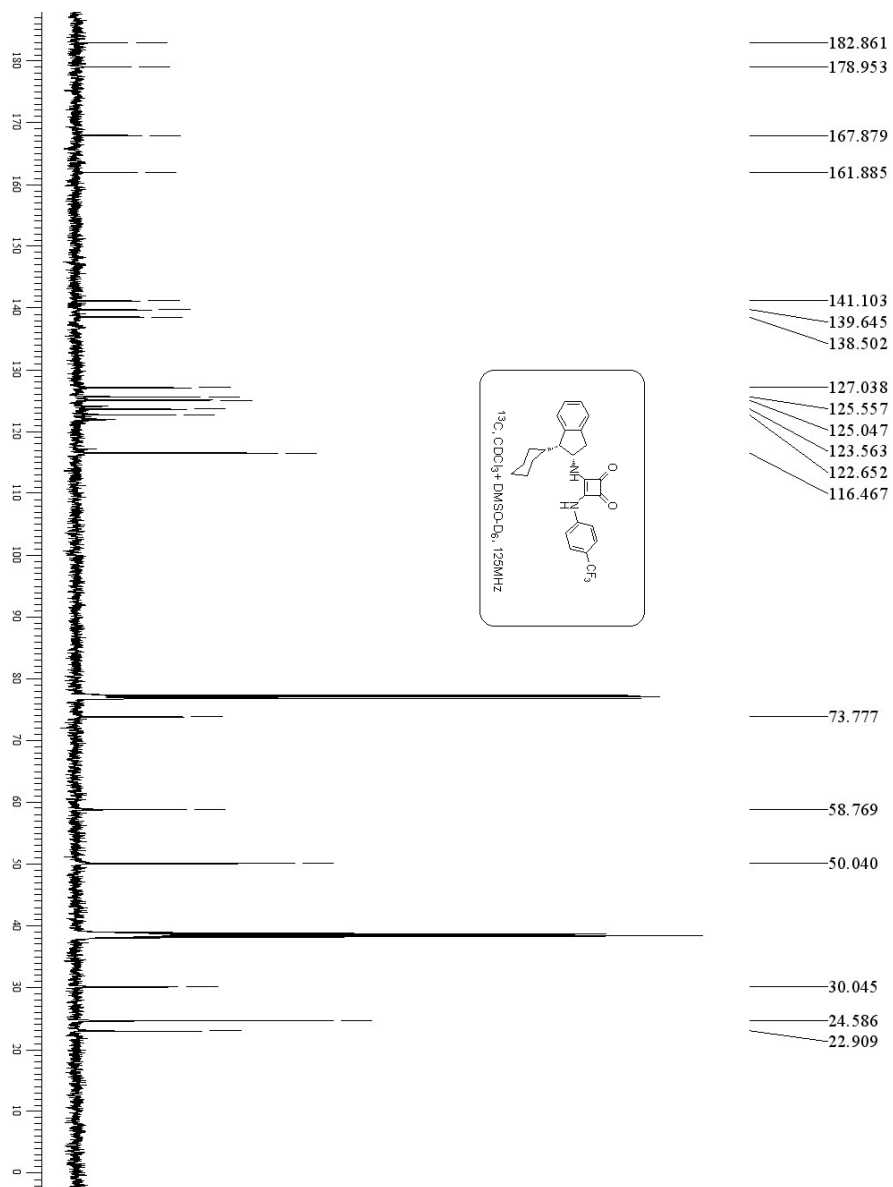

$^1\text{H}$  and  $^{13}\text{C}$  Spectra of Compounds:

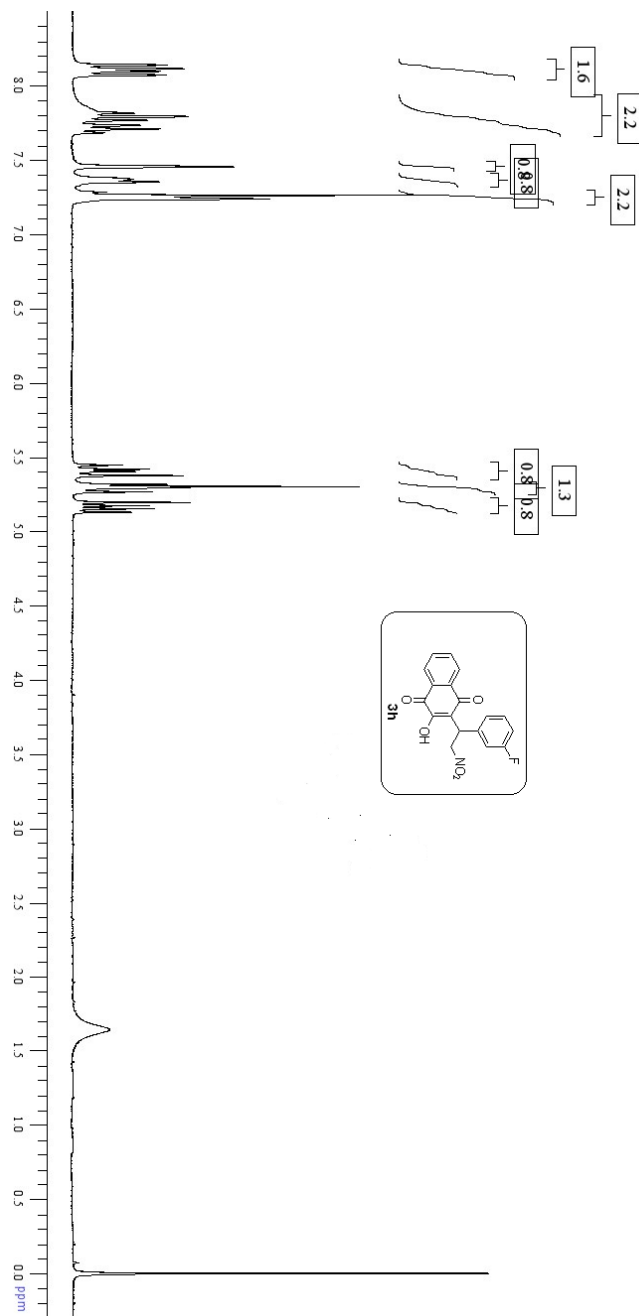

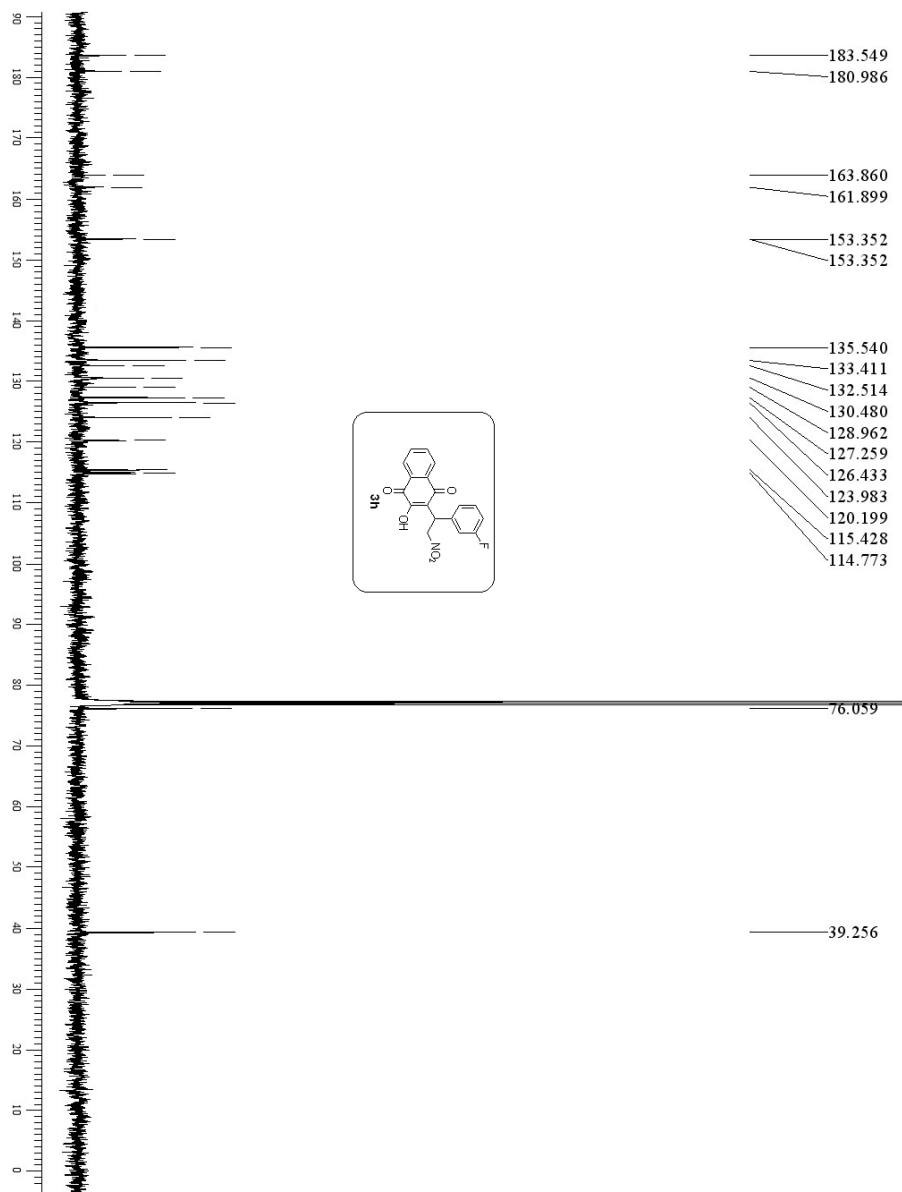

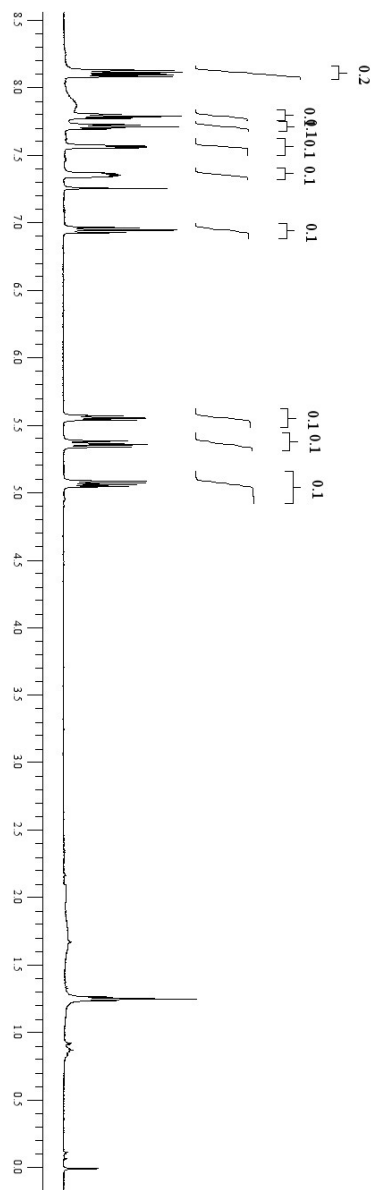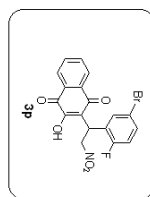

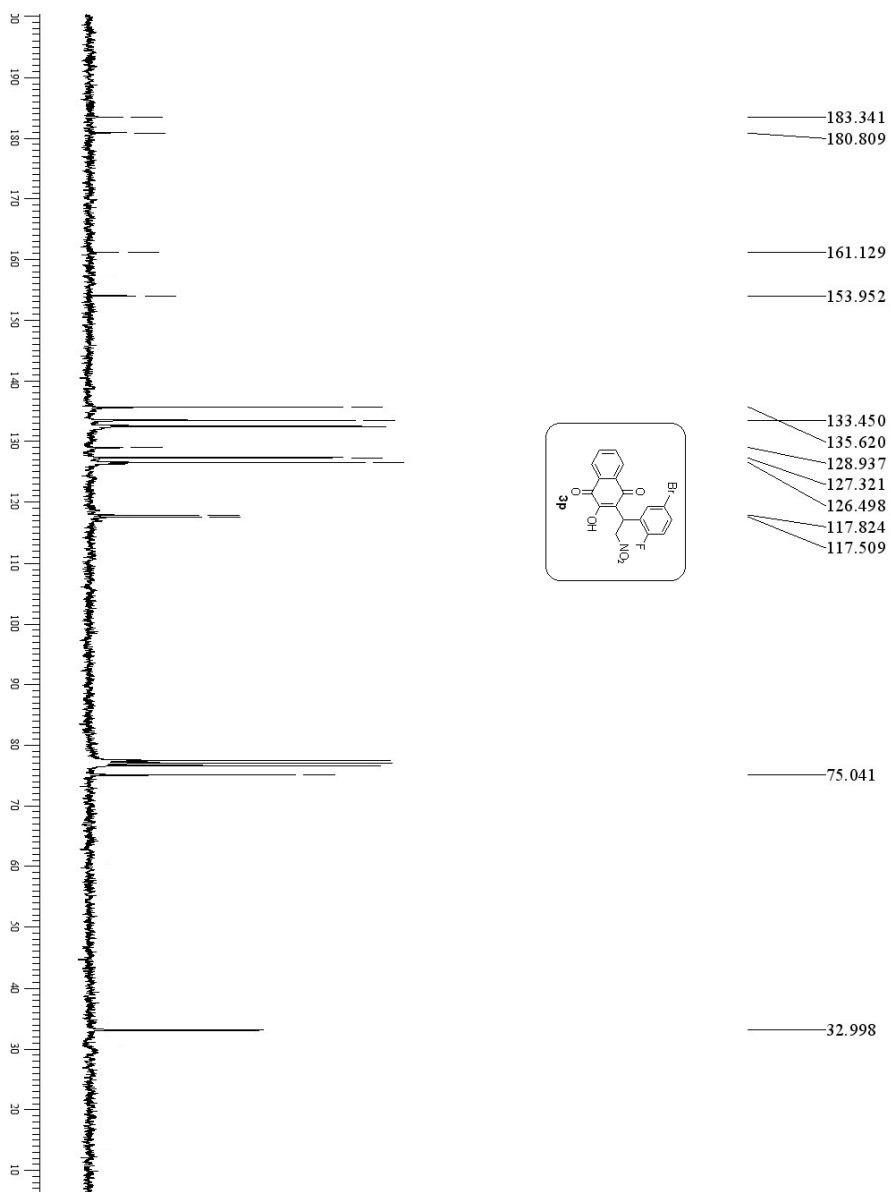

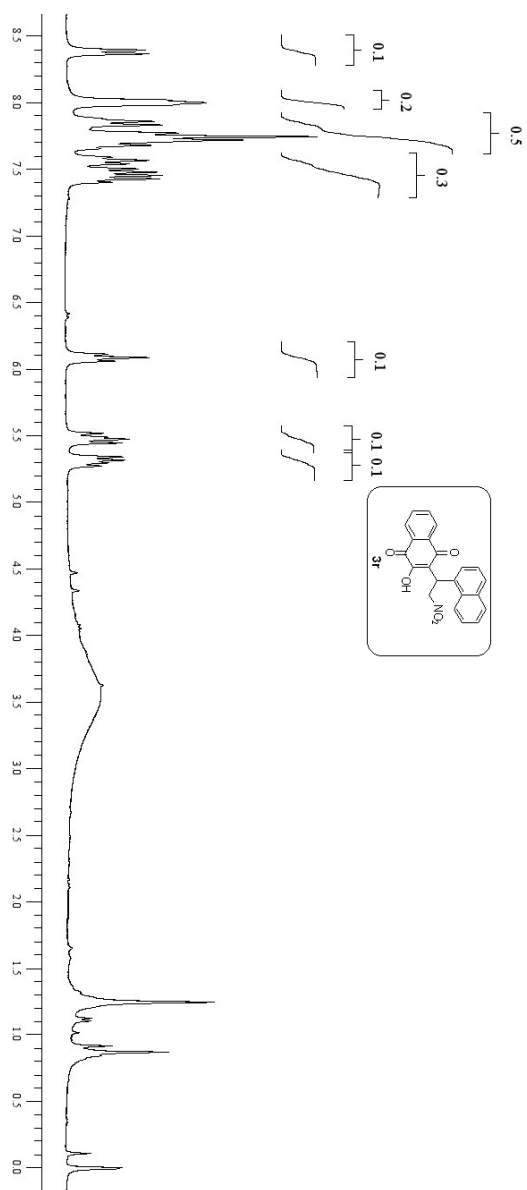

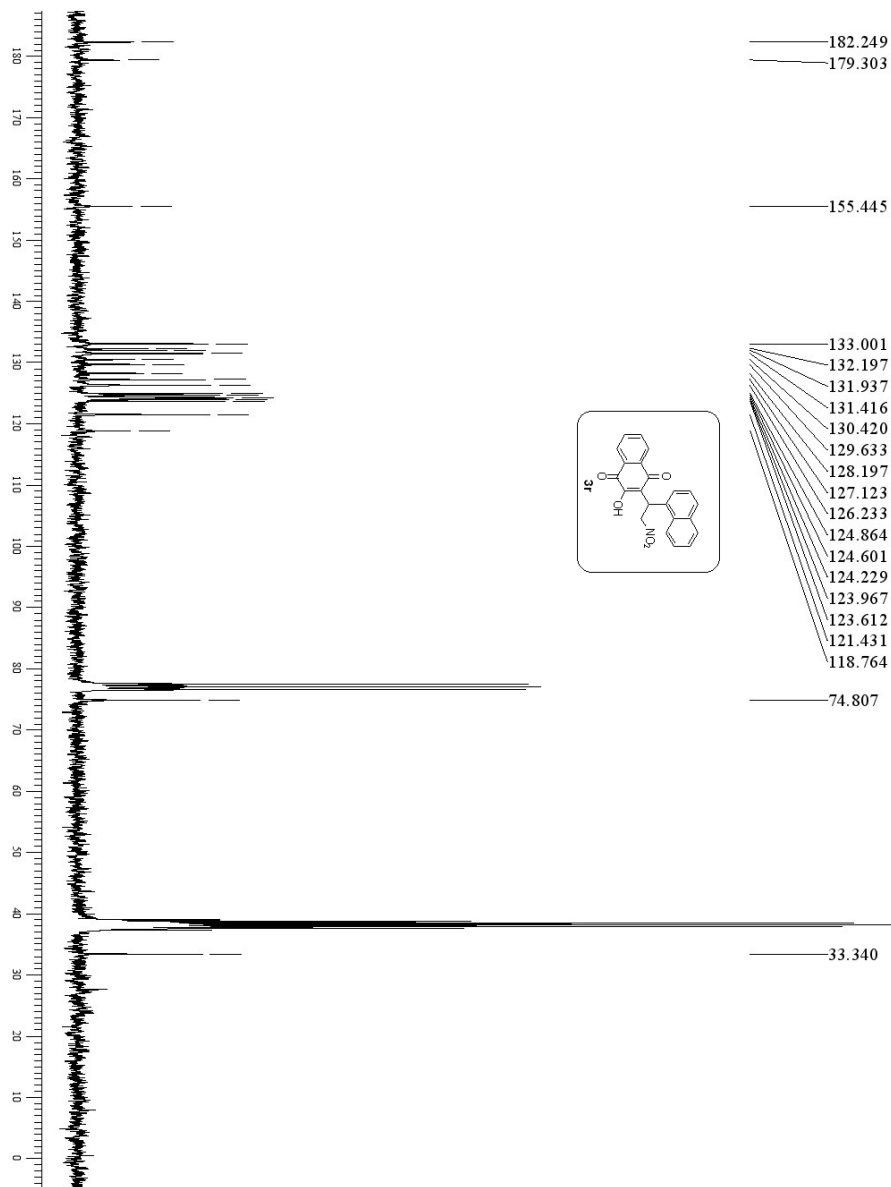



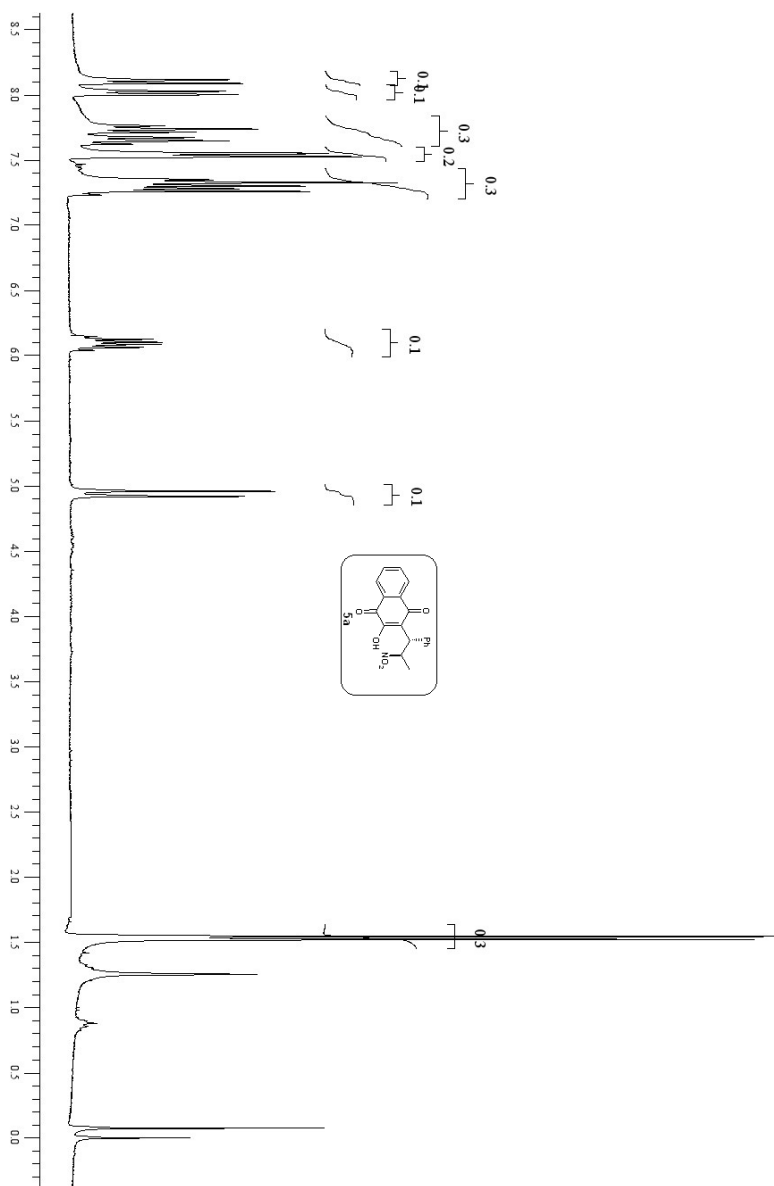

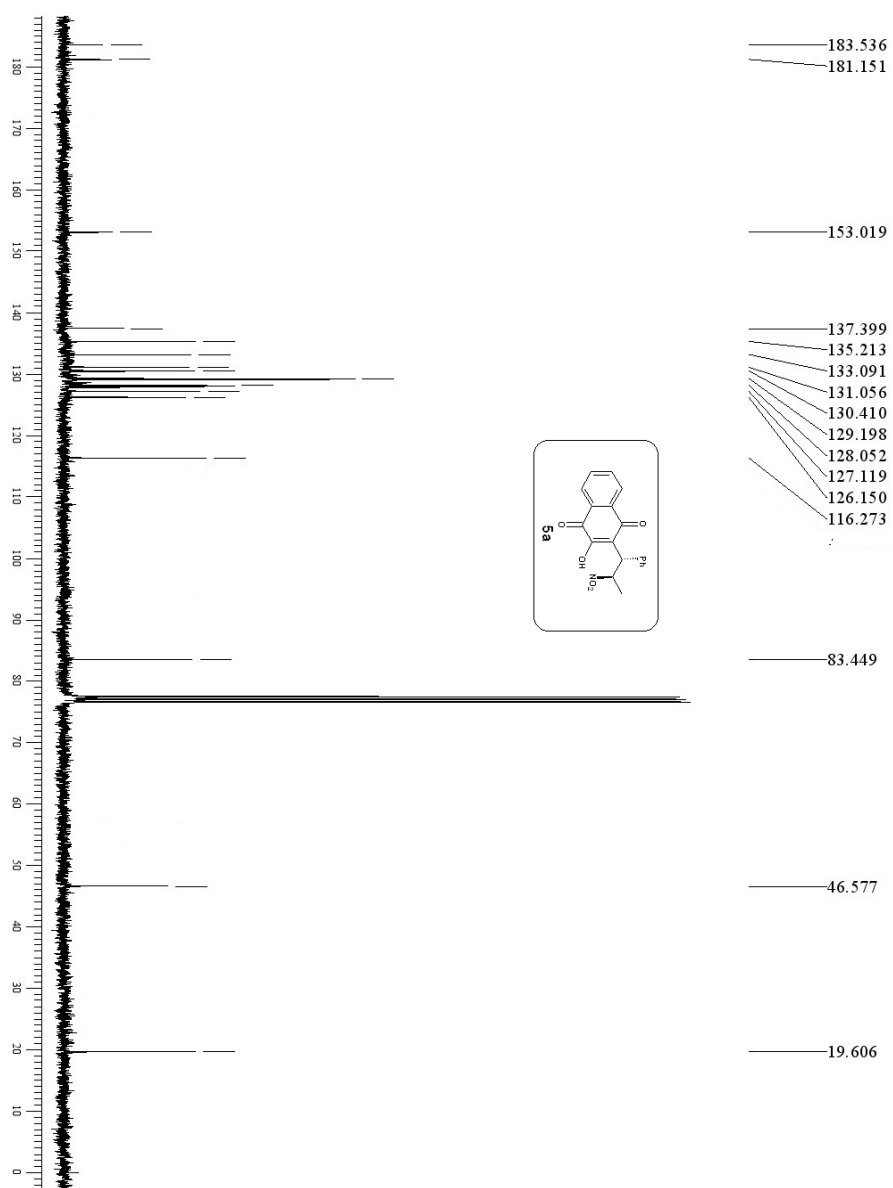

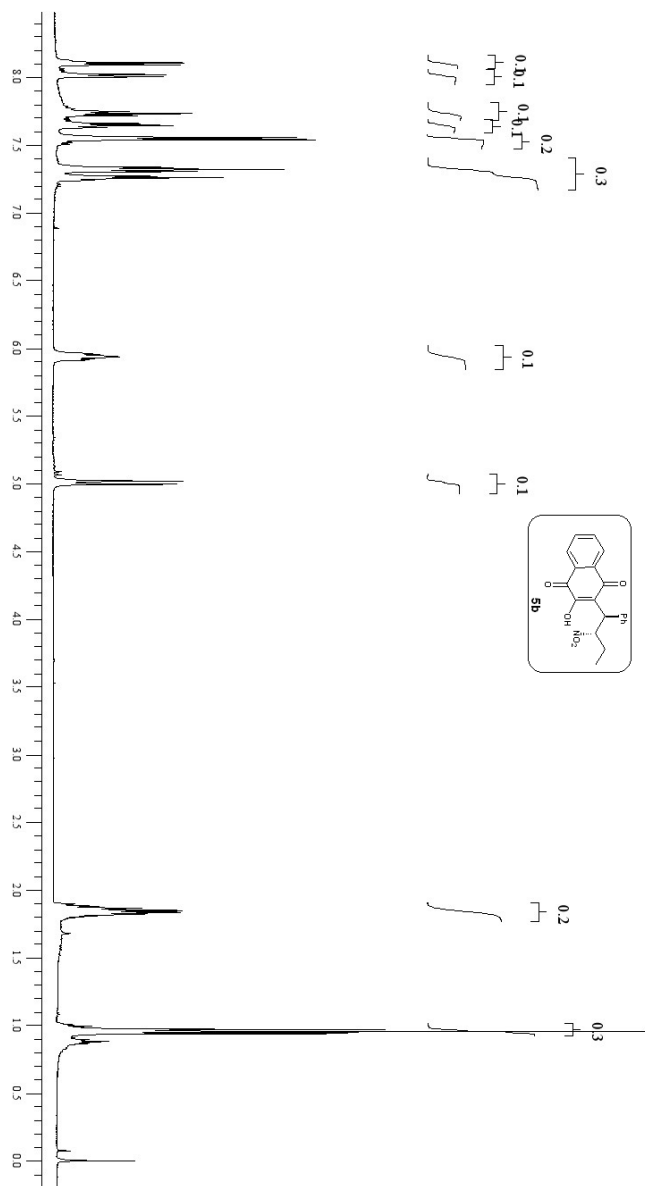

**(R)-2-Hydroxy-3-(2-nitro-1-phenylethyl)naphthalene-1,4-dione (3a)**

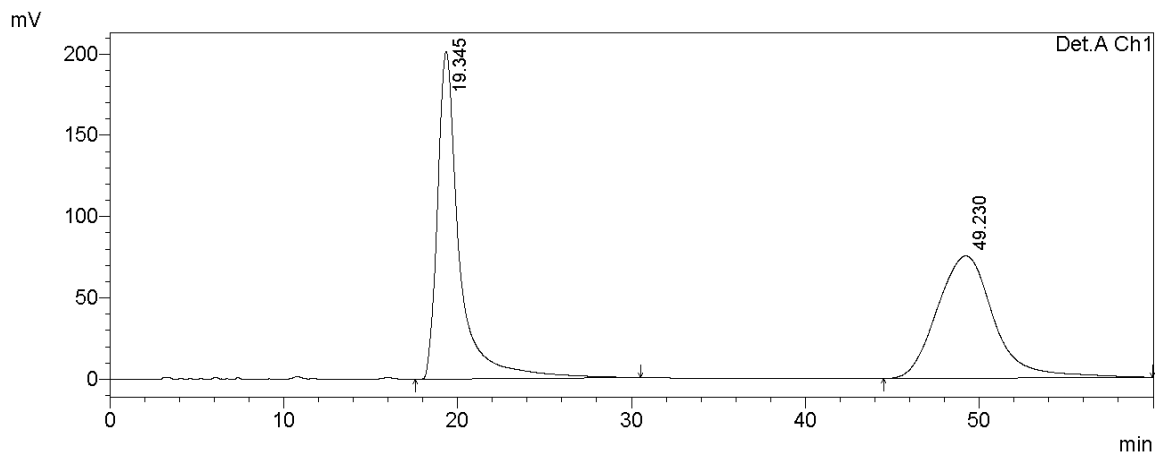

Detector A Ch1 254nm

| Peak# | Ret. Time | Area     | Height | Area %  | Height % |
|-------|-----------|----------|--------|---------|----------|
| 1     | 19.345    | 17662369 | 201435 | 50.904  | 72.843   |
| 2     | 49.230    | 17035216 | 75097  | 49.096  | 27.157   |
| Total |           | 34697585 | 276532 | 100.000 | 100.000  |

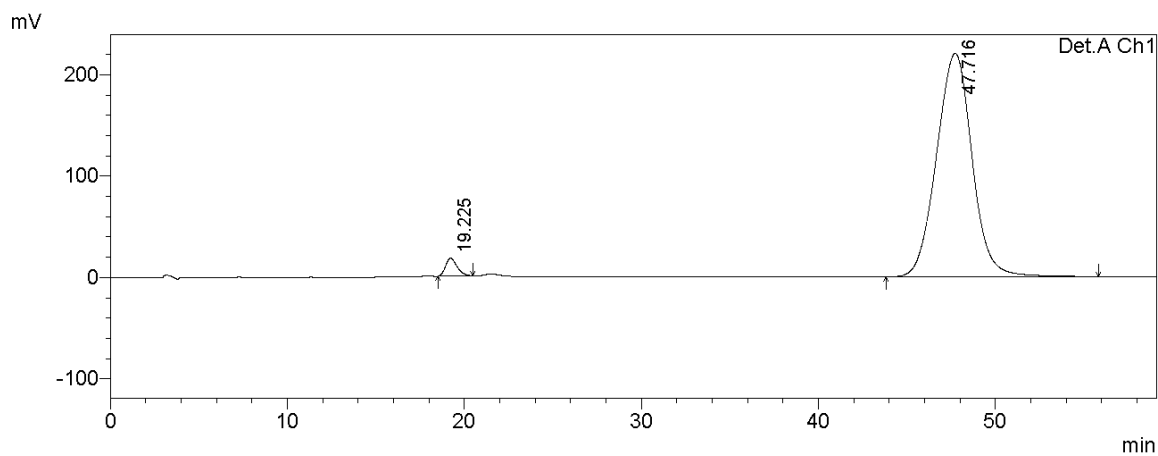

Detector A Ch1 254nm

| Peak# | Ret. Time | Area     | Height | Area %  | Height % |
|-------|-----------|----------|--------|---------|----------|
| 1     | 19.225    | 788829   | 17563  | 2.502   | 7.381    |
| 2     | 47.716    | 30742675 | 220398 | 97.498  | 92.619   |
| Total |           | 31531503 | 237960 | 100.000 | 100.000  |

**(R)-2-Hydroxy-3-(1-(4-methoxyphenyl)-2-nitroethyl)naphthalene-1,4-dione (3c)**

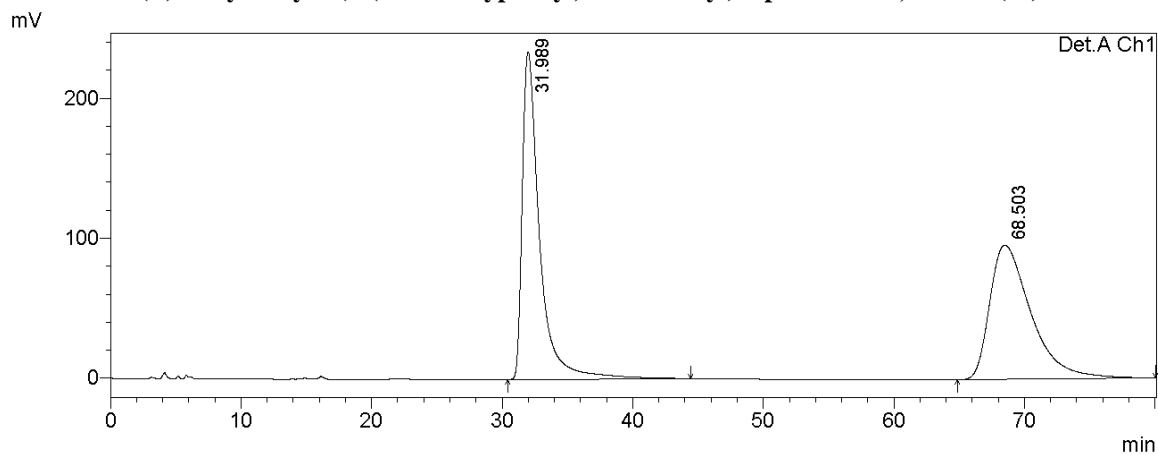

Detector A Ch1 254nm

| Peak# | Ret. Time | Area     | Height | Area %  | Height % |
|-------|-----------|----------|--------|---------|----------|
| 1     | 31.989    | 21600776 | 233891 | 50.564  | 70.909   |
| 2     | 68.503    | 21118854 | 95954  | 49.436  | 29.091   |
| Total |           | 42719629 | 329844 | 100.000 | 100.000  |

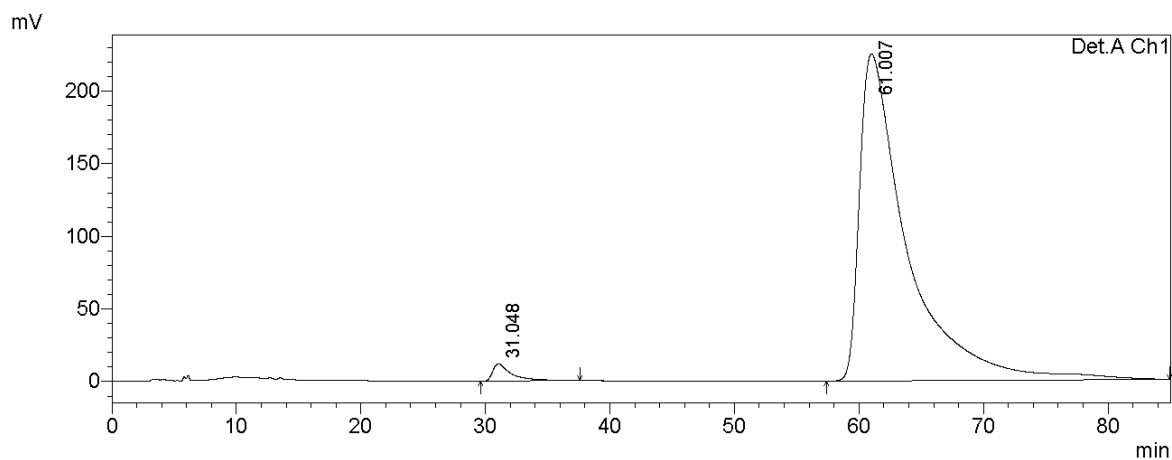

Detector A Ch1 254nm

| Peak# | Ret. Time | Area     | Height | Area %  | Height % |
|-------|-----------|----------|--------|---------|----------|
| 1     | 31.048    | 1291961  | 11937  | 2.112   | 5.033    |
| 2     | 61.007    | 59878490 | 225256 | 97.888  | 94.967   |
| Total |           | 61170451 | 237193 | 100.000 | 100.000  |

**(R)-2-(1-(4-Fluorophenyl)-2-nitroethyl)-3-hydroxynaphthalene-1,4-dione (3d)**

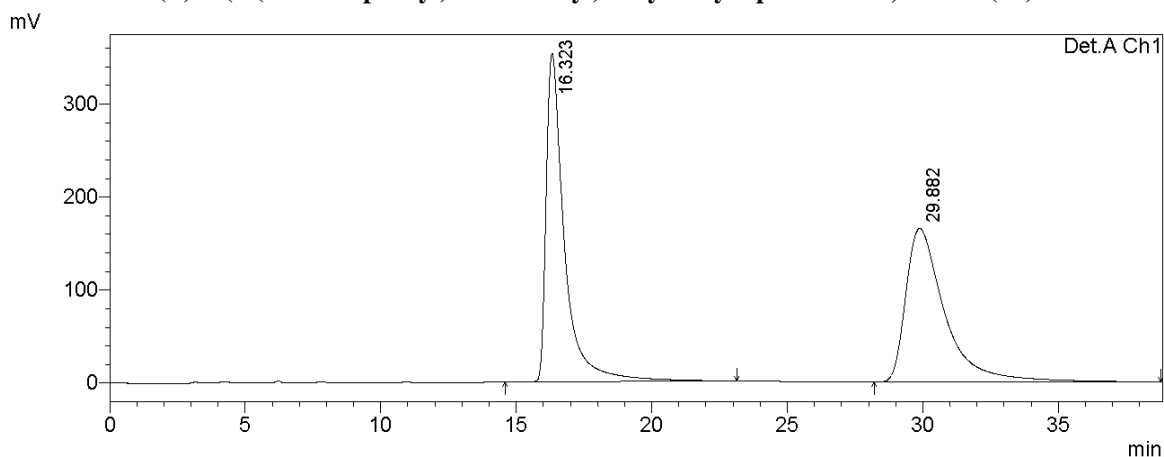

Detector A Ch1 254nm

| Peak# | Ret. Time | Area     | Height | Area %  | Height % |
|-------|-----------|----------|--------|---------|----------|
| 1     | 16.323    | 16712099 | 353251 | 50.213  | 68.175   |
| 2     | 29.882    | 16570184 | 164901 | 49.787  | 31.825   |
| Total |           | 33282284 | 518153 | 100.000 | 100.000  |

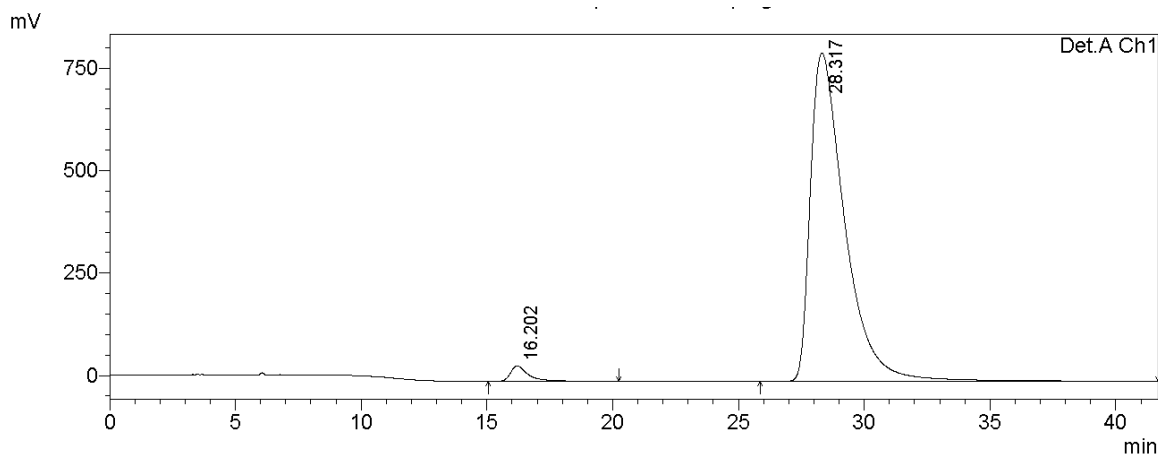

Detector A Ch1 254nm

| Peak# | Ret. Time | Area     | Height | Area %  | Height % |
|-------|-----------|----------|--------|---------|----------|
| 1     | 16.202    | 1902596  | 37884  | 2.428   | 4.513    |
| 2     | 28.317    | 76466802 | 801508 | 97.572  | 95.487   |
| Total |           | 78369399 | 839392 | 100.000 | 100.000  |

**(R)-2-(1-(4-Chlorophenyl)-2-nitroethyl)-3-hydroxynaphthalene-1,4-dione (3e)**

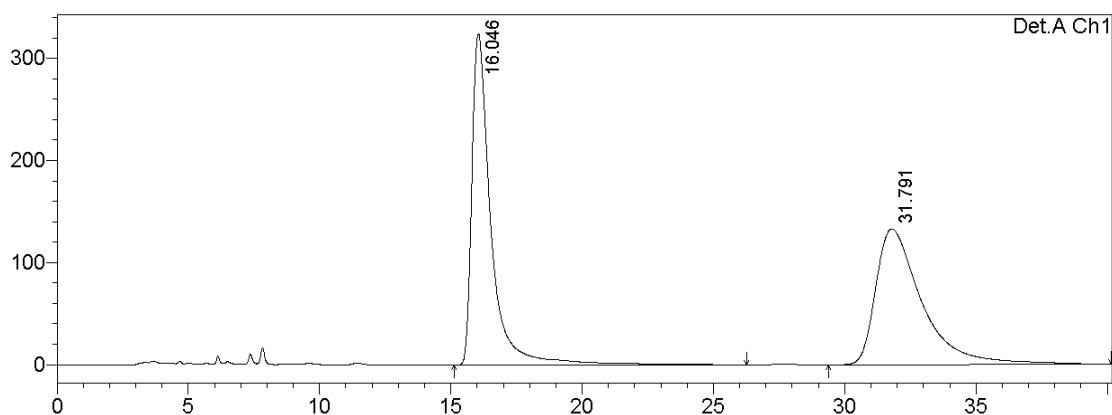

Detector A Ch1 254nm

| Peak# | Ret. Time | Area     | Height | Area %  | Height % |
|-------|-----------|----------|--------|---------|----------|
| 1     | 16.046    | 16495437 | 324806 | 50.312  | 70.955   |
| 2     | 31.791    | 16290996 | 132958 | 49.688  | 29.045   |
| Total |           | 32786433 | 457764 | 100.000 | 100.000  |

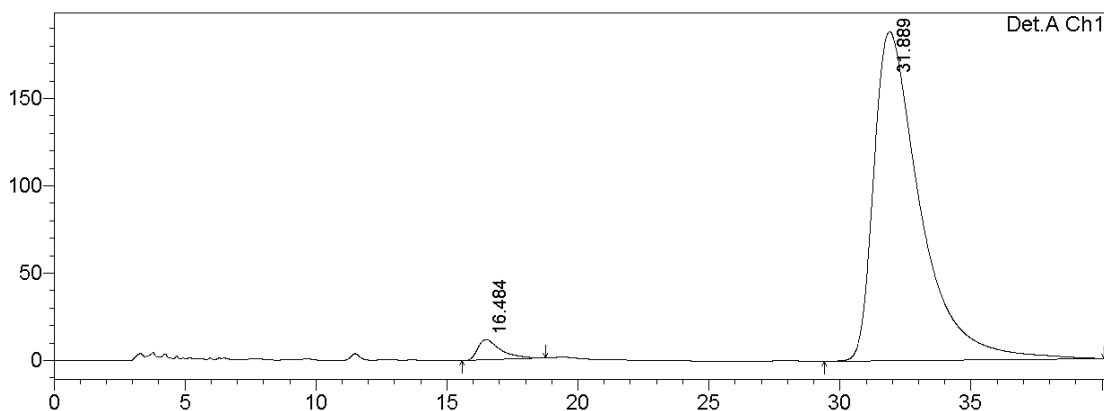

PeakTable

Detector A Ch1 254nm

| Peak# | Ret. Time | Area     | Height | Area %  | Height % |
|-------|-----------|----------|--------|---------|----------|
| 1     | 16.484    | 733265   | 11828  | 3.062   | 5.910    |
| 2     | 31.889    | 23212845 | 188325 | 96.938  | 94.090   |
| Total |           | 23946110 | 200153 | 100.000 | 100.000  |

**(R)-2-(1-(4-Bromophenyl)-2-nitroethyl)-3-hydroxynaphthalene-1,4-dione (3f)**

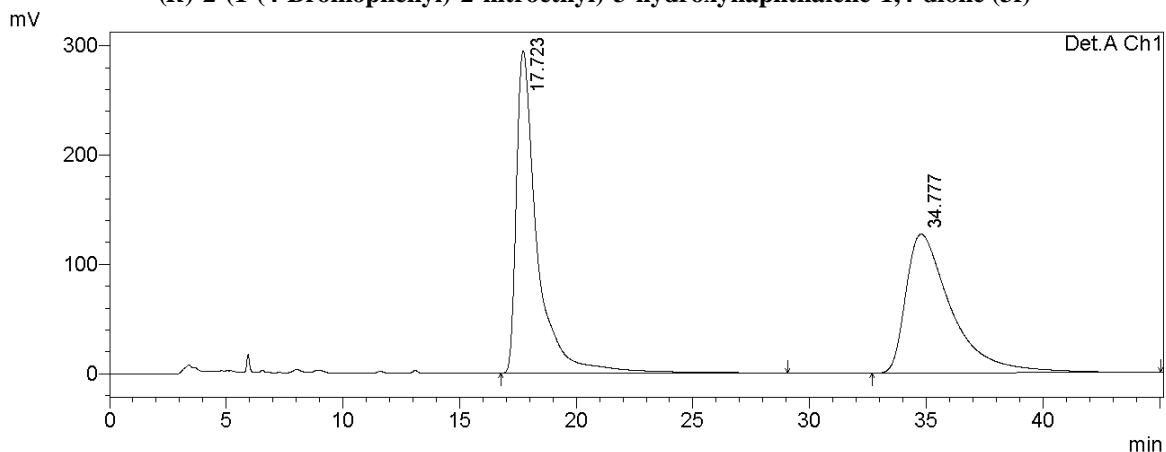

Detector A Ch1 254nm

| Peak# | Ret. Time | Area     | Height | Area %  | Height % |
|-------|-----------|----------|--------|---------|----------|
| 1     | 17.723    | 18365647 | 295124 | 51.428  | 69.861   |
| 2     | 34.777    | 17345931 | 127323 | 48.572  | 30.139   |
| Total |           | 35711578 | 422448 | 100.000 | 100.000  |

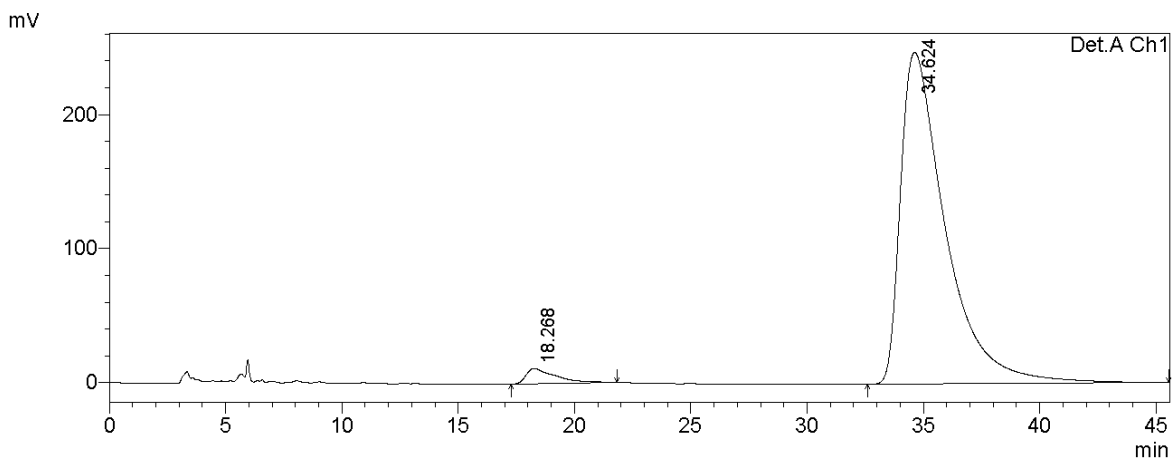

Detector A Ch1 254nm

| Peak# | Ret. Time | Area     | Height | Area %  | Height % |
|-------|-----------|----------|--------|---------|----------|
| 1     | 18.268    | 1010170  | 11394  | 2.944   | 4.402    |
| 2     | 34.624    | 33299762 | 247416 | 97.056  | 95.598   |
| Total |           | 34309931 | 258810 | 100.000 | 100.000  |



**(R)-2-(1-(3-Chlorophenyl)-2-nitroethyl)-3-hydroxynaphthalene-1,4-dione (3g)**

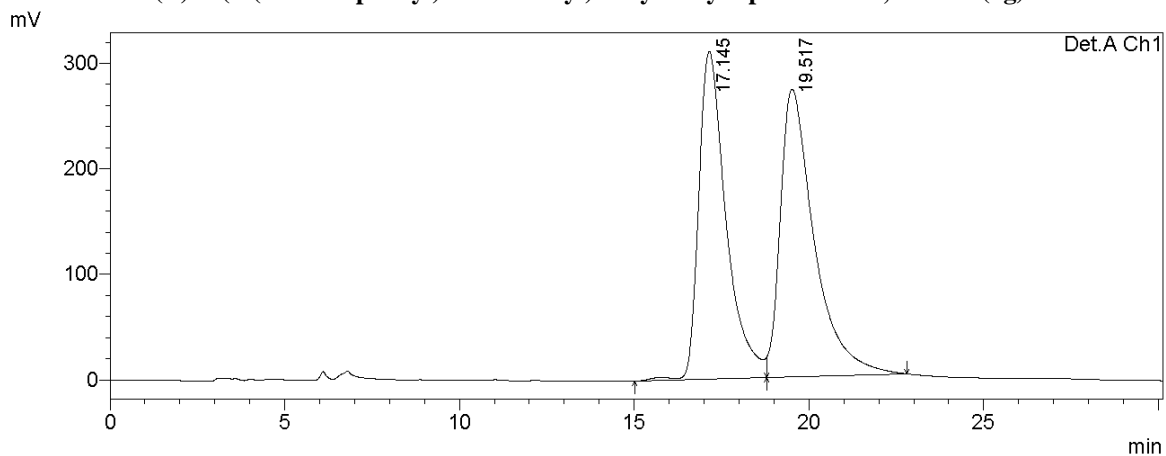

Detector A Ch1 254nm

| Peak# | Ret. Time | Area     | Height | Area %  | Height % |
|-------|-----------|----------|--------|---------|----------|
| 1     | 17.145    | 16941584 | 310582 | 47.935  | 53.238   |
| 2     | 19.517    | 18401321 | 272807 | 52.065  | 46.762   |
| Total |           | 35342904 | 583388 | 100.000 | 100.000  |

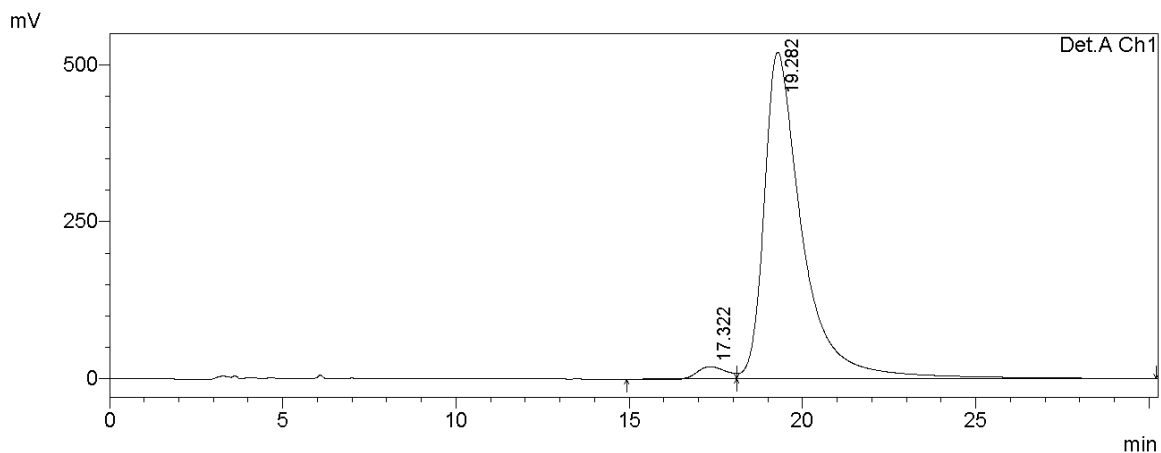

Detector A Ch1 254nm

| Peak# | Ret. Time | Area     | Height | Area %  | Height % |
|-------|-----------|----------|--------|---------|----------|
| 1     | 17.322    | 1178552  | 19655  | 2.849   | 3.644    |
| 2     | 19.282    | 40194115 | 519774 | 97.151  | 96.356   |
| Total |           | 41372667 | 539429 | 100.000 | 100.000  |

**(R)-2-(1-(3-Fluorophenyl)-2-nitroethyl)-3-hydroxynaphthalene-1,4-dione (3h)**

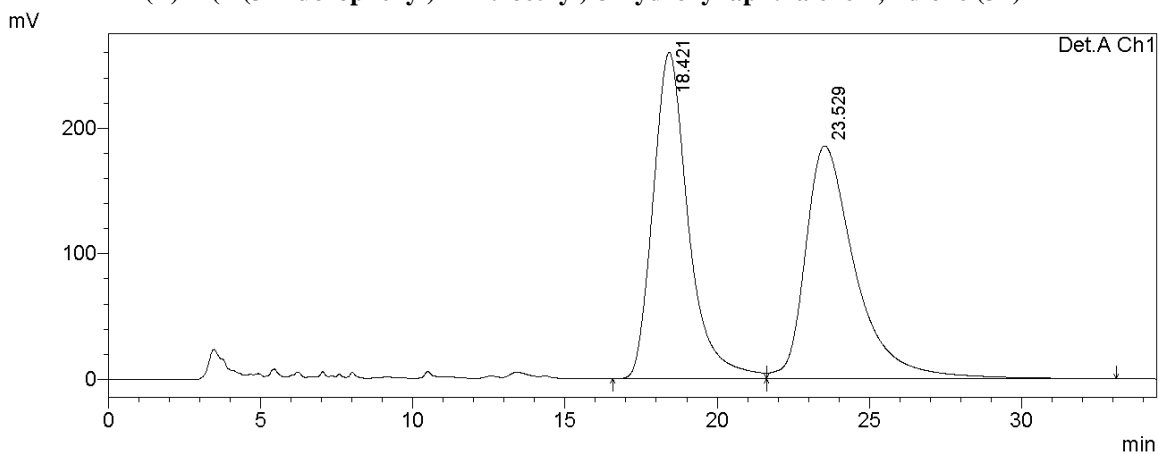

Detector A Ch1 254nm

| Peak# | Ret. Time | Area     | Height | Area %  | Height % |
|-------|-----------|----------|--------|---------|----------|
| 1     | 18.421    | 20977030 | 259891 | 49.809  | 58.373   |
| 2     | 23.529    | 21137741 | 185336 | 50.191  | 41.627   |
| Total |           | 42114771 | 445226 | 100.000 | 100.000  |

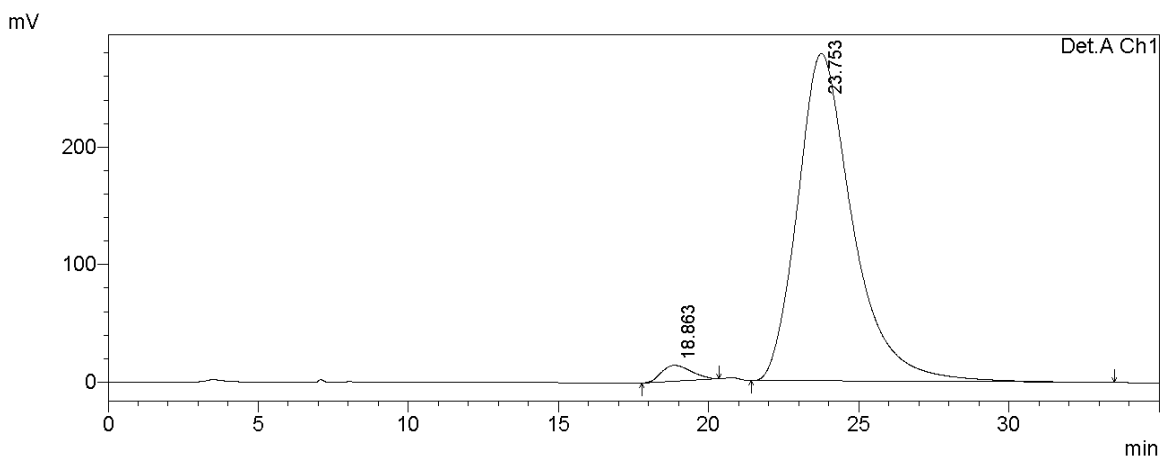

Detector A Ch1 254nm

| Peak# | Ret. Time | Area     | Height | Area %  | Height % |
|-------|-----------|----------|--------|---------|----------|
| 1     | 18.863    | 938678   | 13581  | 2.562   | 4.644    |
| 2     | 23.753    | 35697256 | 278846 | 97.438  | 95.356   |
| Total |           | 36635935 | 292426 | 100.000 | 100.000  |

**(R)-2-(1-(2-Fluorophenyl)-2-nitroethyl)-3-hydroxynaphthalene-1,4-dione (3i)**

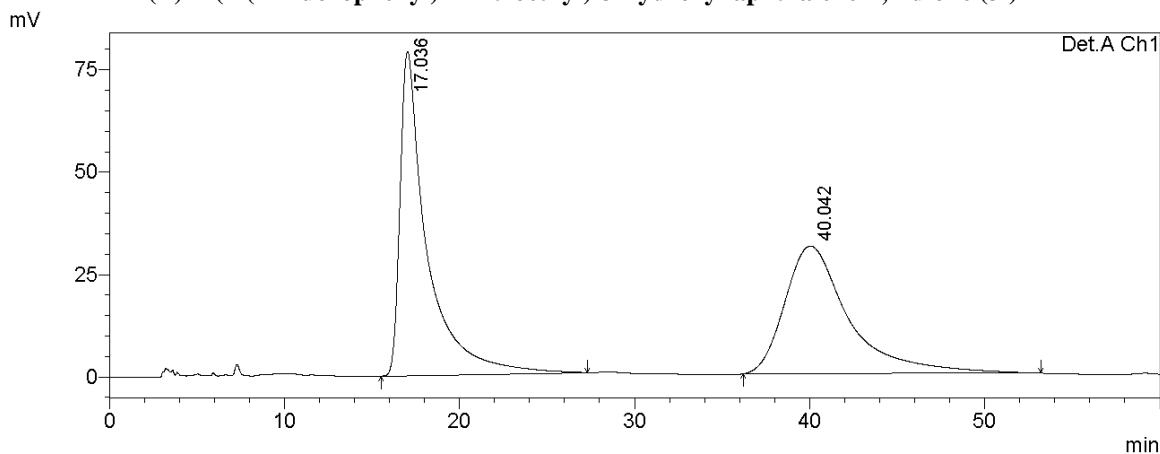

Detector A Ch1 254nm

| Peak# | Ret. Time | Area     | Height | Area %  | Height % |
|-------|-----------|----------|--------|---------|----------|
| 1     | 17.036    | 8452239  | 79152  | 51.576  | 71.732   |
| 2     | 40.042    | 7935676  | 31192  | 48.424  | 28.268   |
| Total |           | 16387915 | 110344 | 100.000 | 100.000  |

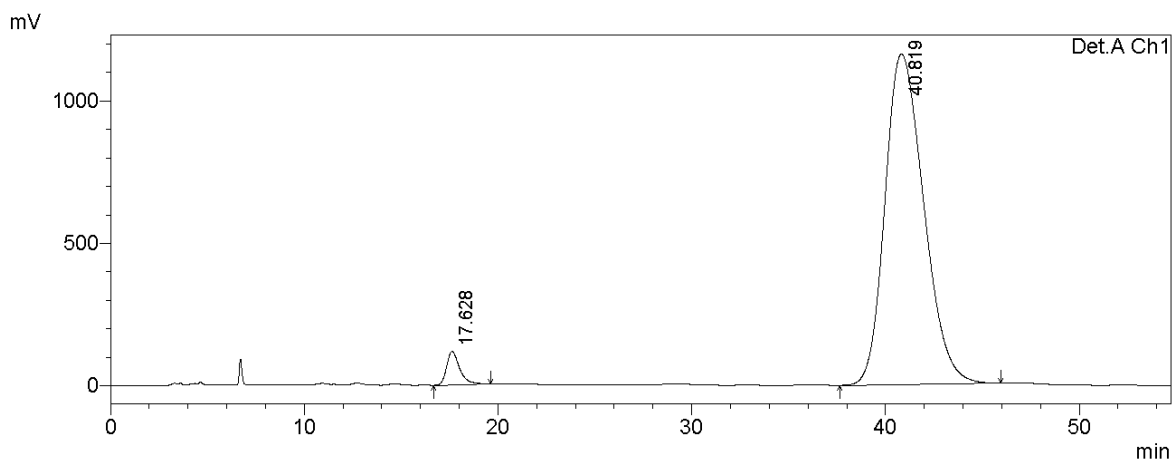

Detector A Ch1 254nm

| Peak# | Ret. Time | Area      | Height  | Area %  | Height % |
|-------|-----------|-----------|---------|---------|----------|
| 1     | 17.628    | 5507586   | 117613  | 3.301   | 9.201    |
| 2     | 40.819    | 161345163 | 1160678 | 96.699  | 90.799   |
| Total |           | 166852749 | 1278291 | 100.000 | 100.000  |

**(R)-2-(1-(2-Chlorophenyl)-2-nitroethyl)-3-hydroxynaphthalene-1,4-dione (3j)**

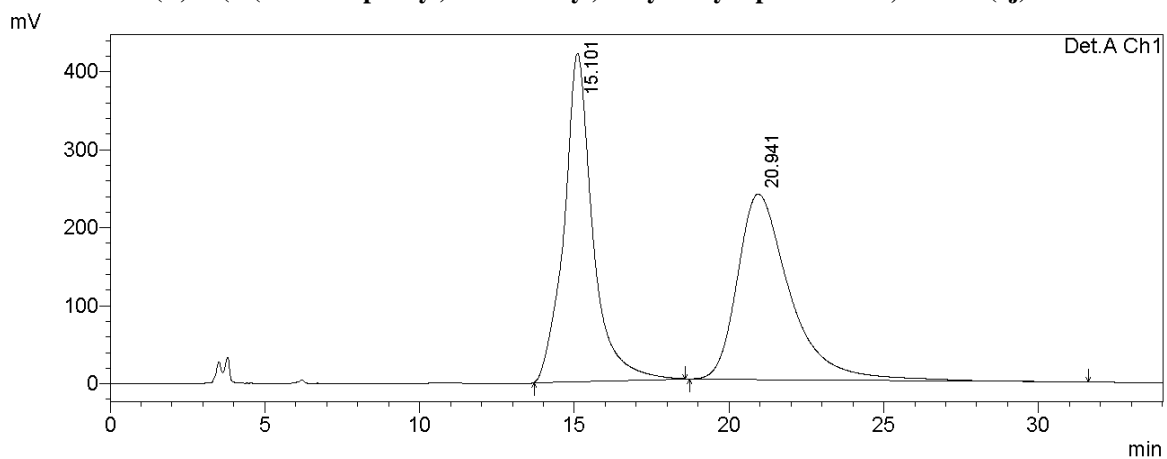

Detector A Ch1 254nm

| Peak# | Ret. Time | Area     | Height | Area %  | Height % |
|-------|-----------|----------|--------|---------|----------|
| 1     | 15.101    | 27136213 | 420343 | 49.253  | 63.895   |
| 2     | 20.941    | 27959128 | 237520 | 50.747  | 36.105   |
| Total |           | 55095341 | 657863 | 100.000 | 100.000  |

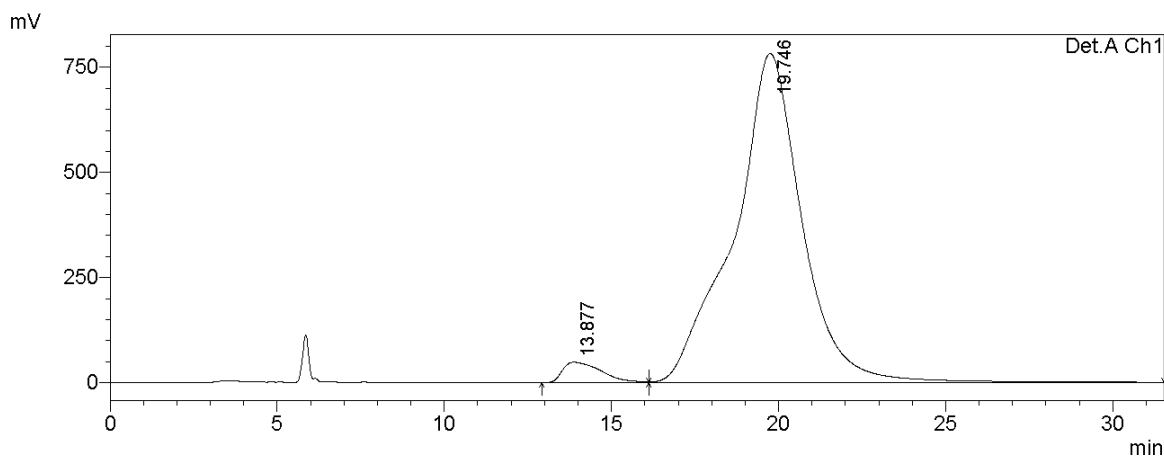

Detector A Ch1 254nm

| Peak# | Ret. Time | Area      | Height | Area %  | Height % |
|-------|-----------|-----------|--------|---------|----------|
| 1     | 13.877    | 3870453   | 48292  | 3.386   | 5.812    |
| 2     | 19.746    | 110433094 | 782636 | 96.614  | 94.188   |
| Total |           | 114303547 | 830928 | 100.000 | 100.000  |

**(R)-2-(1-(2-Bromophenyl)-2-nitroethyl)-3-hydroxynaphthalene-1,4-dione (3k)**

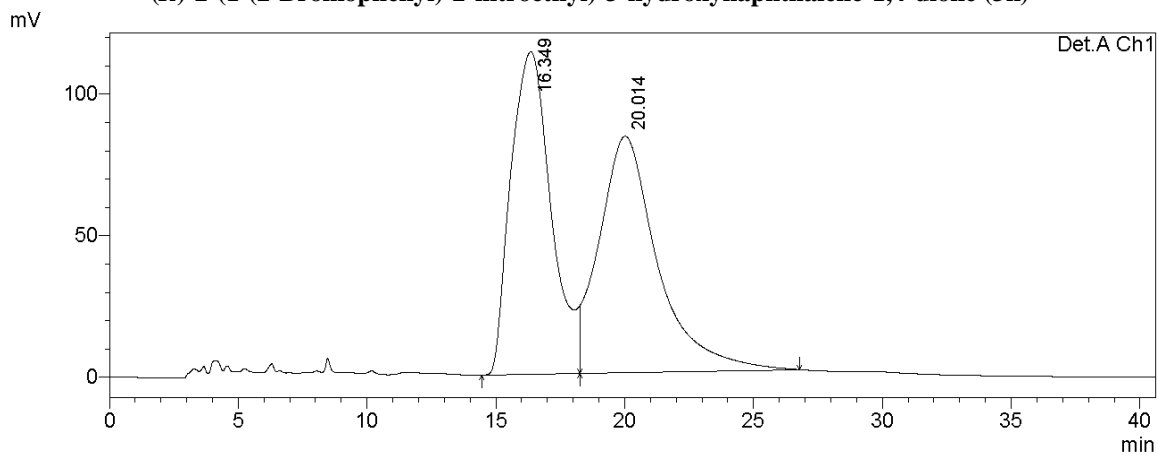

Detector A Ch1 254nm

| Peak# | Ret. Time | Area     | Height | Area %  | Height % |
|-------|-----------|----------|--------|---------|----------|
| 1     | 16.349    | 12430718 | 114048 | 48.535  | 57.717   |
| 2     | 20.014    | 13181372 | 83552  | 51.465  | 42.283   |
| Total |           | 25612090 | 197600 | 100.000 | 100.000  |

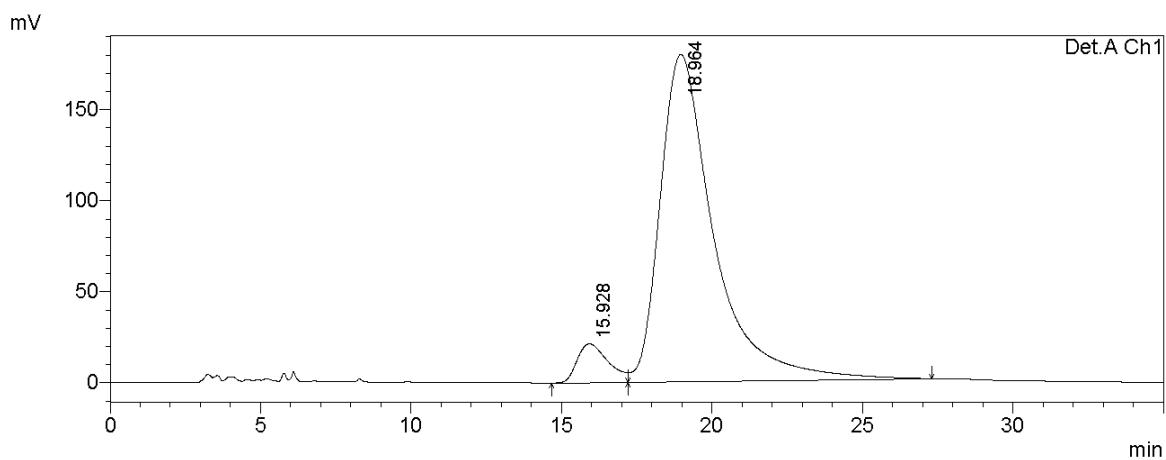

Detector A Ch1 254nm

| Peak# | Ret. Time | Area     | Height | Area %  | Height % |
|-------|-----------|----------|--------|---------|----------|
| 1     | 15.928    | 1527456  | 21250  | 6.416   | 10.575   |
| 2     | 18.964    | 22278611 | 179703 | 93.584  | 89.425   |
| Total |           | 23806067 | 200953 | 100.000 | 100.000  |

**(R)-2-(1-(2-Methoxyphenyl)-2-nitroethyl)-3-hydroxynaphthalene-1,4-dione (3I)**

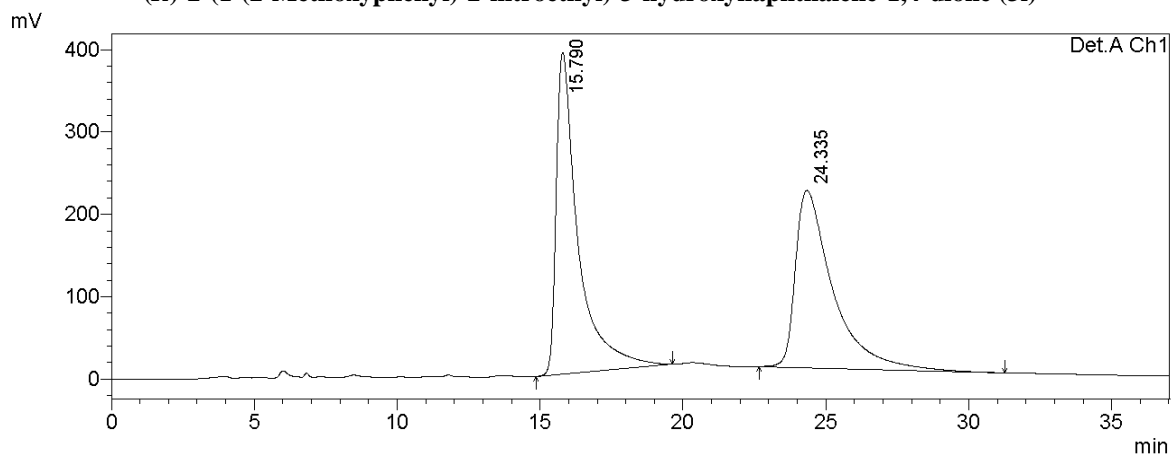

Detector A Ch1 254nm

| Peak# | Ret. Time | Area     | Height | Area %  | Height % |
|-------|-----------|----------|--------|---------|----------|
| 1     | 15.790    | 20857004 | 390975 | 51.622  | 64.471   |
| 2     | 24.335    | 19546447 | 215457 | 48.378  | 35.529   |
| Total |           | 40403451 | 606431 | 100.000 | 100.000  |

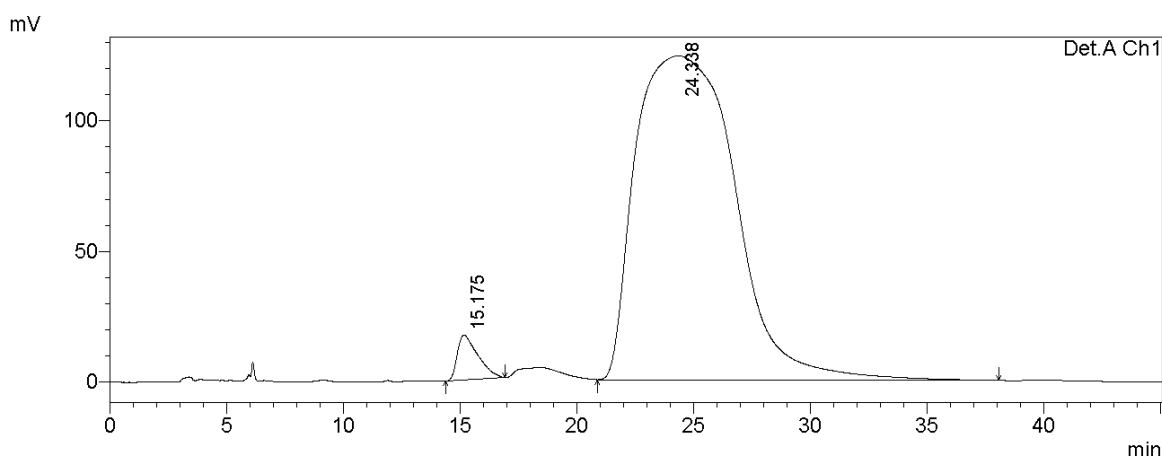

Detector A Ch1 254nm

| Peak# | Ret. Time | Area     | Height | Area %  | Height % |
|-------|-----------|----------|--------|---------|----------|
| 1     | 15.175    | 1059797  | 17233  | 2.802   | 12.214   |
| 2     | 24.338    | 36758065 | 123865 | 97.198  | 87.786   |
| Total |           | 37817862 | 141098 | 100.000 | 100.000  |

**(R)-2-(1-(2,4-Dichlorophenyl)-2-nitroethyl)-3-hydroxy naphthalene-1,4-dione (3m)**

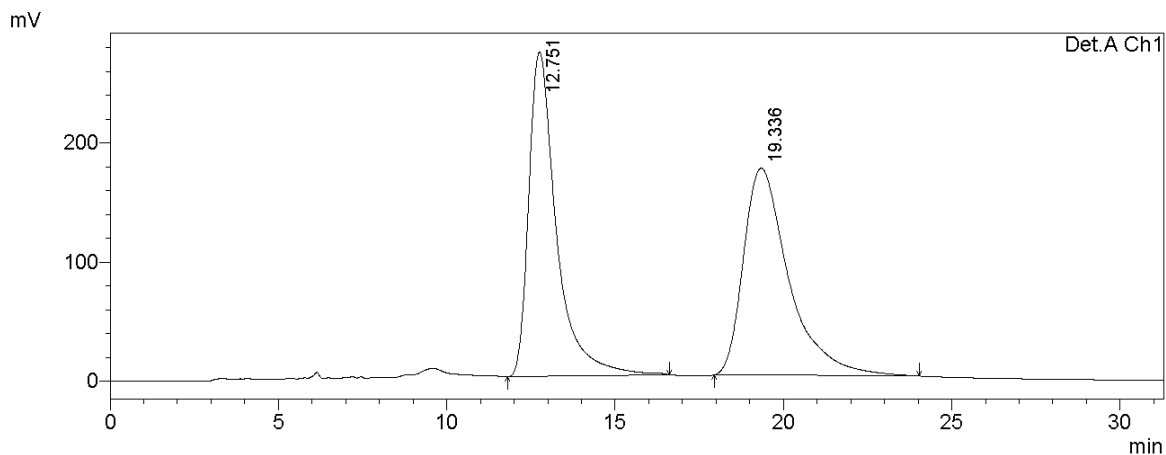

Detector A Ch1 254nm

| Peak# | Ret. Time | Area     | Height | Area %  | Height % |
|-------|-----------|----------|--------|---------|----------|
| 1     | 12.751    | 15586951 | 272454 | 48.869  | 61.048   |
| 2     | 19.336    | 16308154 | 173842 | 51.131  | 38.952   |
| Total |           | 31895105 | 446296 | 100.000 | 100.000  |

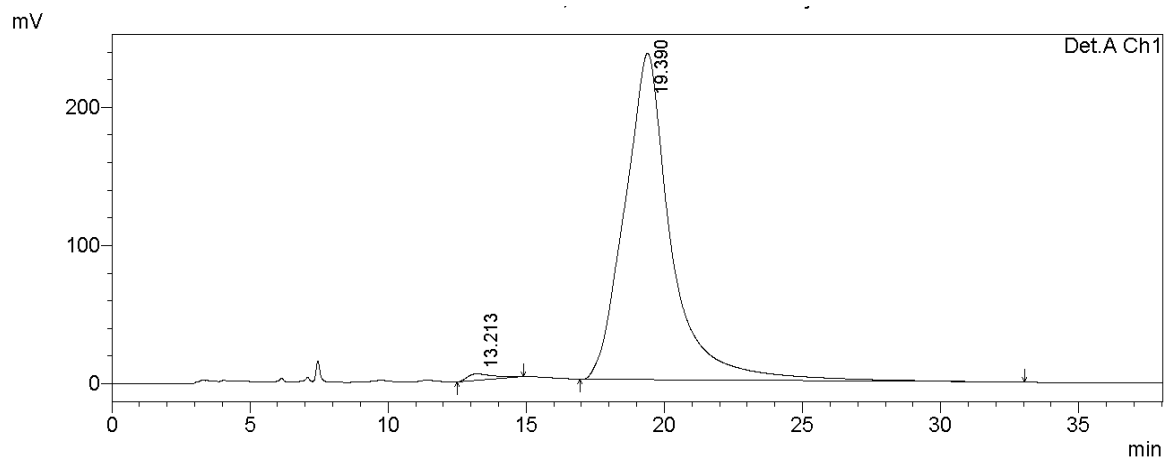

Detector A Ch1 254nm

| Peak# | Ret. Time | Area     | Height | Area %  | Height % |
|-------|-----------|----------|--------|---------|----------|
| 1     | 13.213    | 299763   | 4645   | 1.070   | 1.927    |
| 2     | 19.390    | 27722208 | 236440 | 98.930  | 98.073   |
| Total |           | 28021971 | 241085 | 100.000 | 100.000  |

**(R)-2-(1-(3,4-Dichlorophenyl)-2-nitroethyl)-3-hydroxy naphthalene-1,4-dione (3n)**

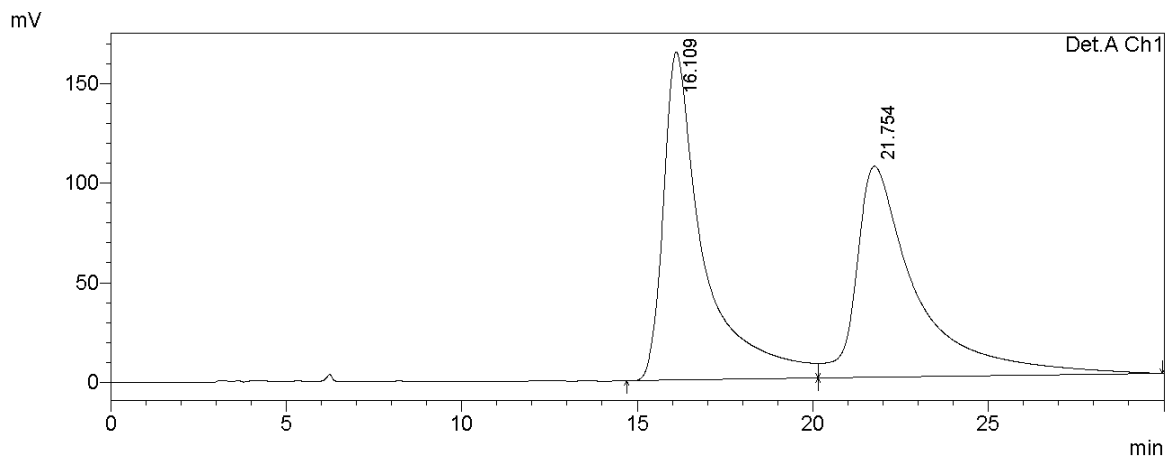

Detector A Ch1 254nm

| Peak# | Ret. Time | Area     | Height | Area %  | Height % |
|-------|-----------|----------|--------|---------|----------|
| 1     | 16.109    | 13174754 | 164773 | 50.764  | 60.832   |
| 2     | 21.754    | 12778122 | 106092 | 49.236  | 39.168   |
| Total |           | 25952876 | 270865 | 100.000 | 100.000  |

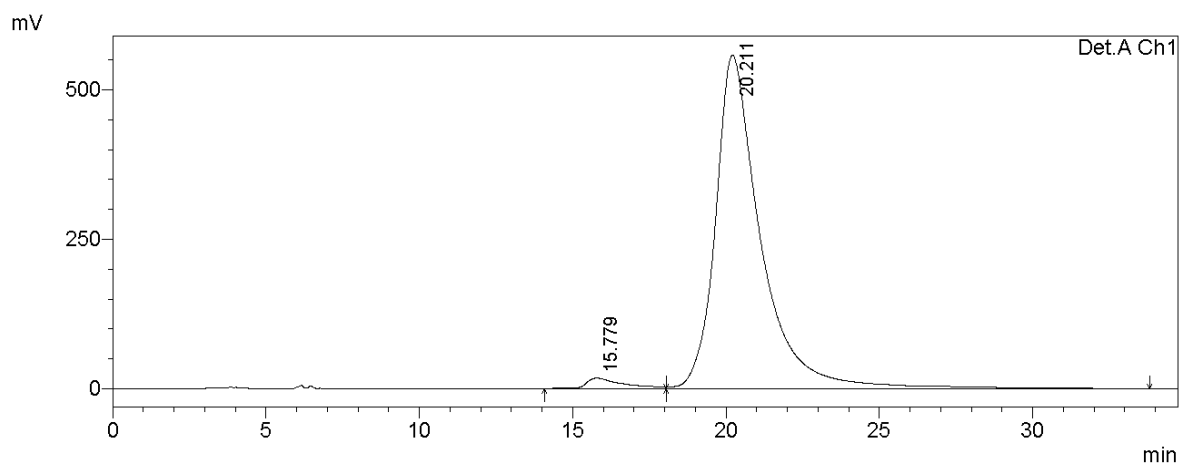

Detector A Ch1 254nm

| Peak# | Ret. Time | Area     | Height | Area %  | Height % |
|-------|-----------|----------|--------|---------|----------|
| 1     | 15.779    | 1379185  | 17233  | 2.354   | 2.996    |
| 2     | 20.211    | 57209755 | 557978 | 97.646  | 97.004   |
| Total |           | 58588940 | 575211 | 100.000 | 100.000  |



**(R)-2-(1-(3,5-Dimethylphenyl)-2-nitroethyl)-3-hydroxy naphthalene-1,4-dione (3o)**

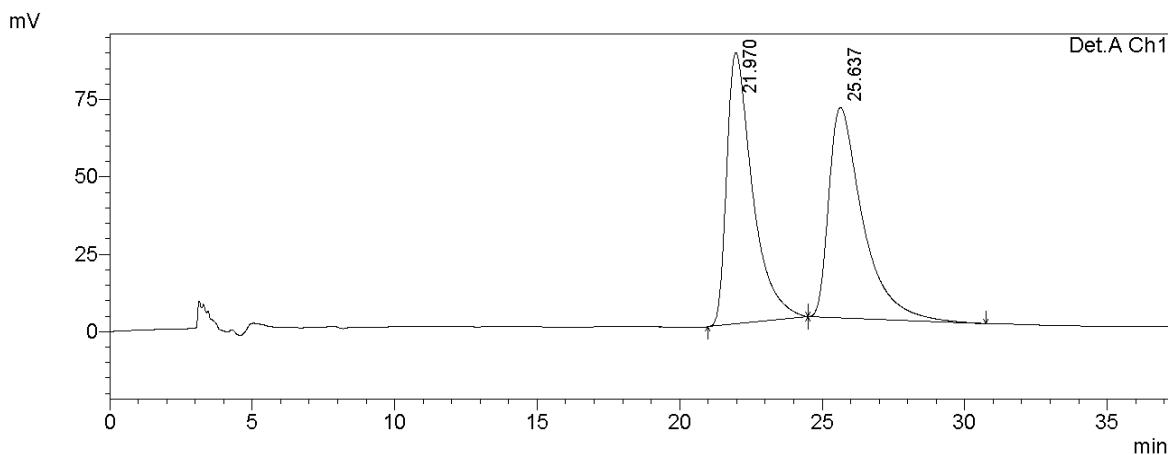

Detector A Ch1 254nm

| Peak# | Ret. Time | Area     | Height | Area %  | Height % |
|-------|-----------|----------|--------|---------|----------|
| 1     | 21.970    | 5539139  | 87668  | 49.652  | 56.337   |
| 2     | 25.637    | 5616708  | 67946  | 50.348  | 43.663   |
| Total |           | 11155847 | 155613 | 100.000 | 100.000  |

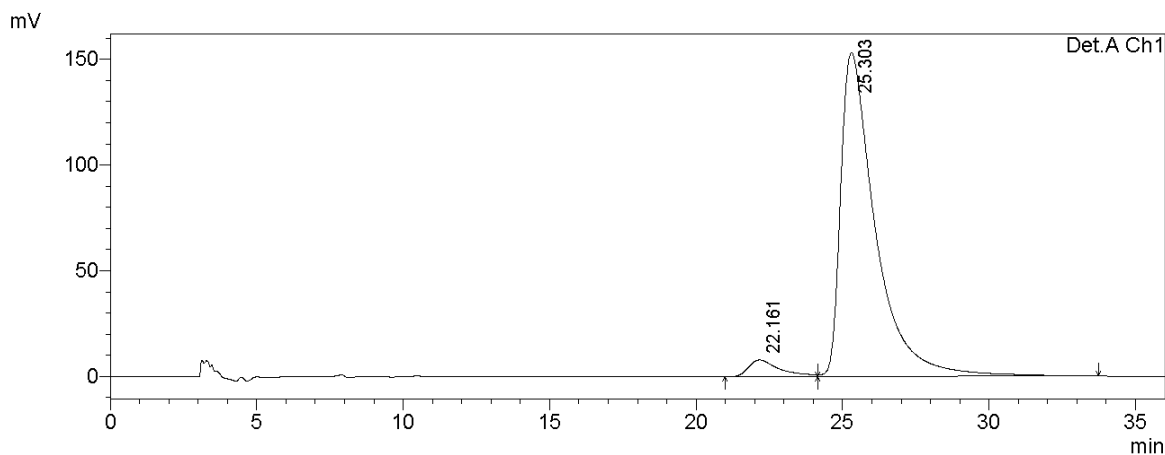

Detector A Ch1 254nm

| Peak# | Ret. Time | Area     | Height | Area %  | Height % |
|-------|-----------|----------|--------|---------|----------|
| 1     | 22.161    | 594352   | 7982   | 4.469   | 4.951    |
| 2     | 25.303    | 12704599 | 153235 | 95.531  | 95.049   |
| Total |           | 13298952 | 161217 | 100.000 | 100.000  |

**(R)-2-(1-(5-bromo-2-fluorophenyl)-2-nitroethyl)-3-hydroxynaphthalene-1,4-dione (3p)**

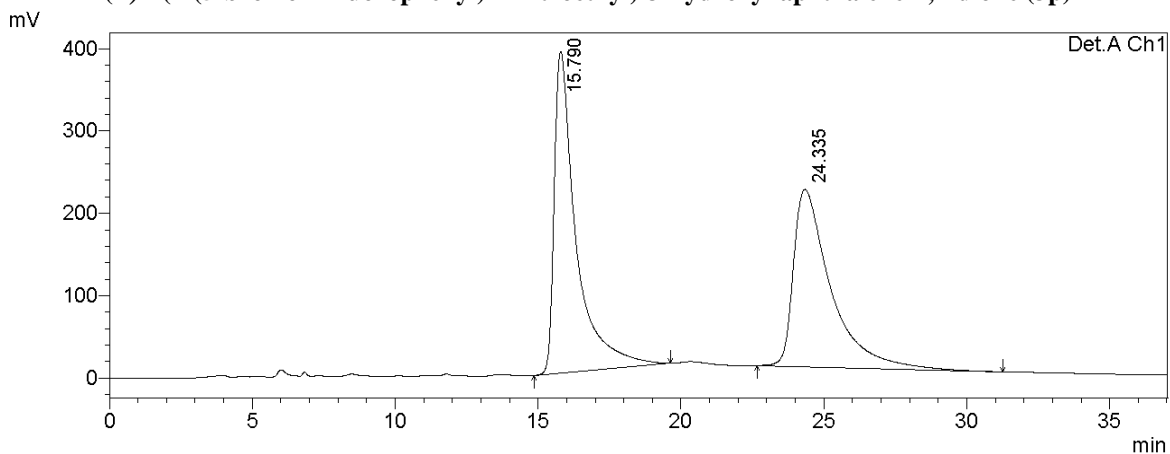

Detector A Ch1 254nm

| Peak# | Ret. Time | Area     | Height | Area %  | Height % |
|-------|-----------|----------|--------|---------|----------|
| 1     | 15.790    | 20857004 | 390975 | 51.622  | 64.471   |
| 2     | 24.335    | 19546447 | 215457 | 48.378  | 35.529   |
| Total |           | 40403451 | 606431 | 100.000 | 100.000  |

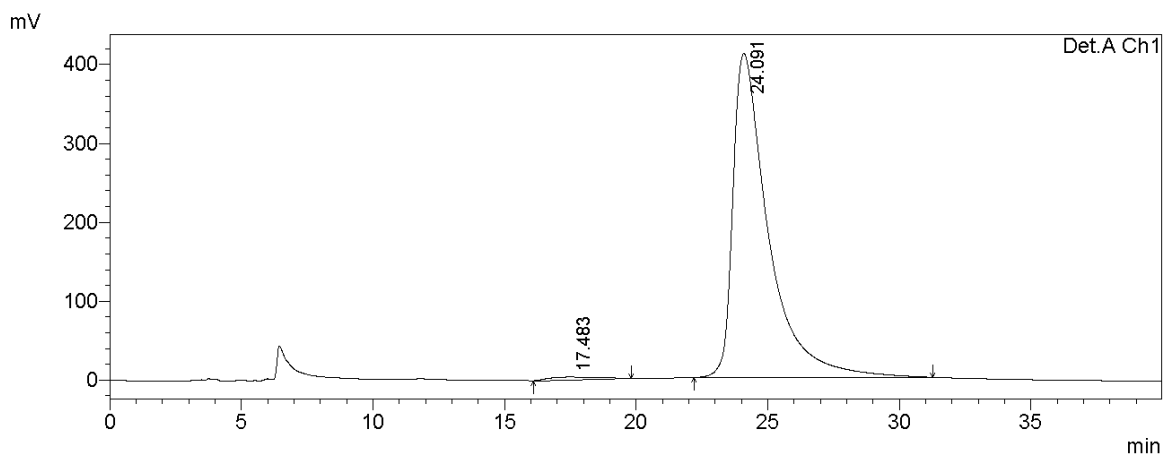

Detector A Ch1 254nm

| Peak# | Ret. Time | Area     | Height | Area %  | Height % |
|-------|-----------|----------|--------|---------|----------|
| 1     | 17.483    | 430700   | 3429   | 1.103   | 0.827    |
| 2     | 24.091    | 38602659 | 411026 | 98.897  | 99.173   |
| Total |           | 39033360 | 414456 | 100.000 | 100.000  |

**(R)-2-Hydroxy-3-(1-(naphthalen-2-yl)-2-nitroethyl)naphthalene-1,4-dione (3q)**

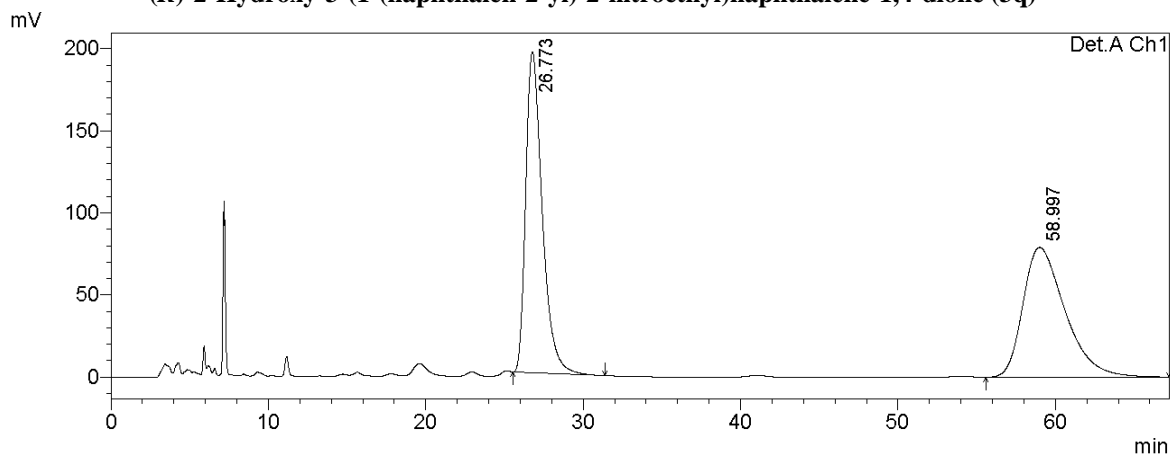

Detector A Ch1 254nm

| Peak# | Ret. Time | Area     | Height | Area %  | Height % |
|-------|-----------|----------|--------|---------|----------|
| 1     | 26.773    | 14295990 | 195558 | 49.336  | 71.223   |
| 2     | 58.997    | 14680910 | 79012  | 50.664  | 28.777   |
| Total |           | 28976899 | 274569 | 100.000 | 100.000  |

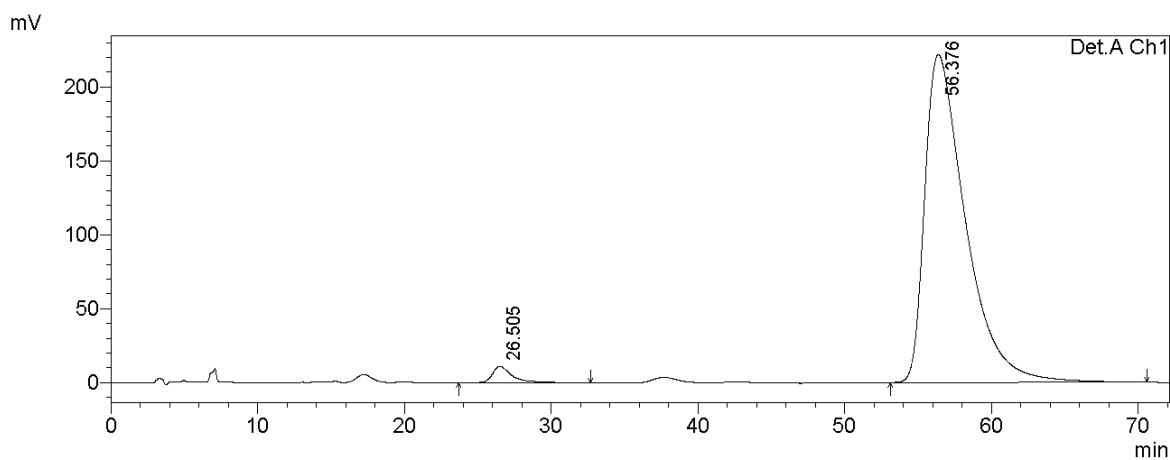

Detector A Ch1 254nm

| Peak# | Ret. Time | Area     | Height | Area %  | Height % |
|-------|-----------|----------|--------|---------|----------|
| 1     | 26.505    | 1118605  | 11212  | 2.546   | 4.811    |
| 2     | 56.376    | 42819353 | 221824 | 97.454  | 95.189   |
| Total |           | 43937958 | 233036 | 100.000 | 100.000  |

**(R)-2-Hydroxy-3-(1-(naphthalen-1-yl)-2-nitroethyl)naphthalene-1,4-dione (3r)**

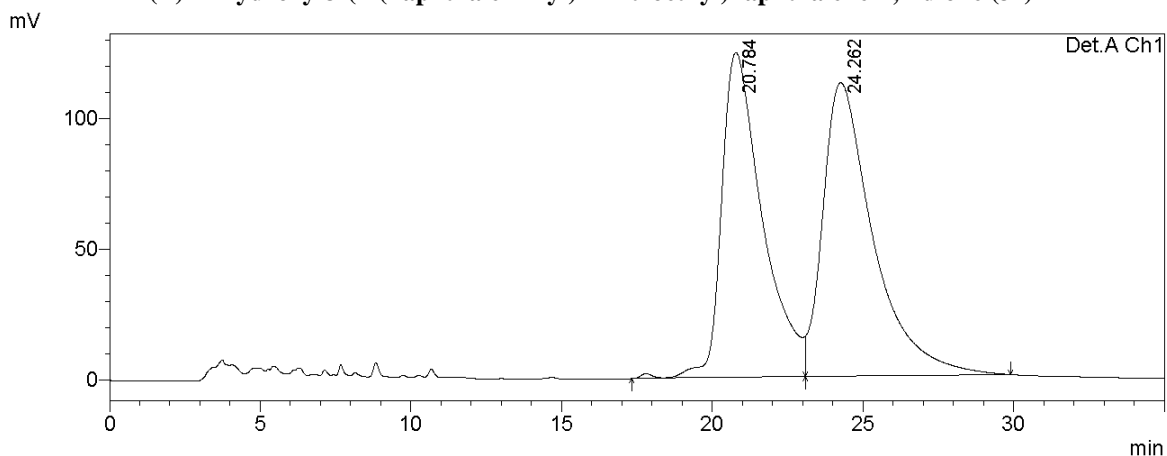

Detector A Ch1 254nm

| Peak# | Ret. Time | Area     | Height | Area %  | Height % |
|-------|-----------|----------|--------|---------|----------|
| 1     | 20.784    | 11726836 | 124215 | 47.400  | 52.500   |
| 2     | 24.262    | 13013237 | 112384 | 52.600  | 47.500   |
| Total |           | 24740073 | 236599 | 100.000 | 100.000  |

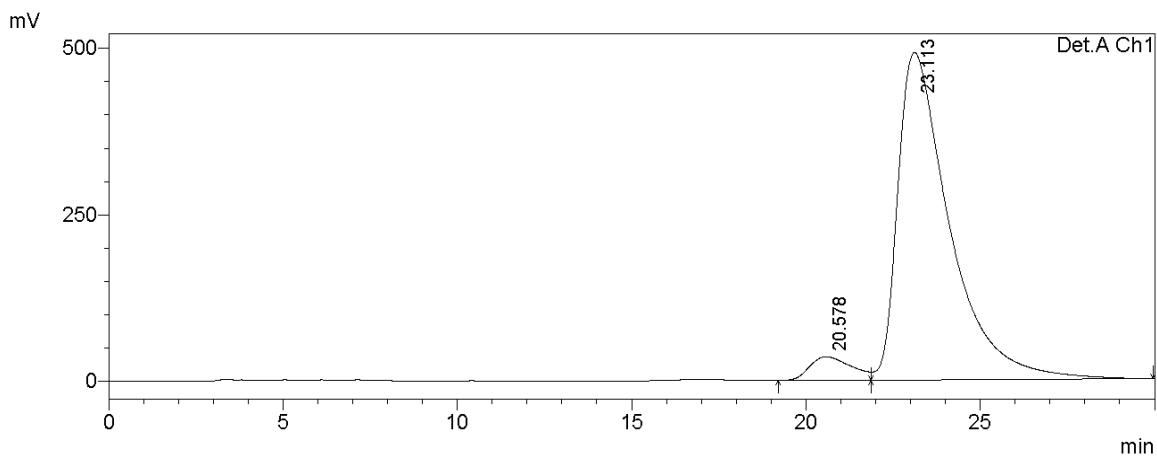

Detector A Ch1 254nm

| Peak# | Ret. Time | Area     | Height | Area %  | Height % |
|-------|-----------|----------|--------|---------|----------|
| 1     | 20.578    | 2920927  | 35142  | 5.420   | 6.666    |
| 2     | 23.113    | 50966085 | 492010 | 94.580  | 93.334   |
| Total |           | 53887012 | 527152 | 100.000 | 100.000  |

**(R)-2-(1-(Furan-2-yl)-2-nitroethyl)-3-hydroxynaphthalene-1,4-dione (3s)**

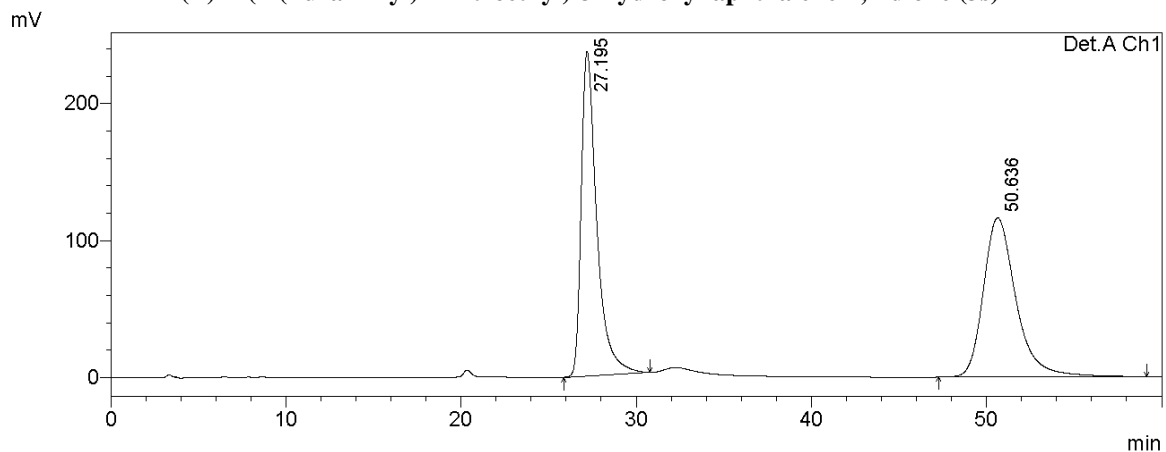

Detector A Ch1 254nm

| Peak# | Ret. Time | Area     | Height | Area %  | Height % |
|-------|-----------|----------|--------|---------|----------|
| 1     | 27.195    | 14632238 | 237010 | 49.233  | 67.099   |
| 2     | 50.636    | 15087905 | 116213 | 50.767  | 32.901   |
| Total |           | 29720143 | 353223 | 100.000 | 100.000  |

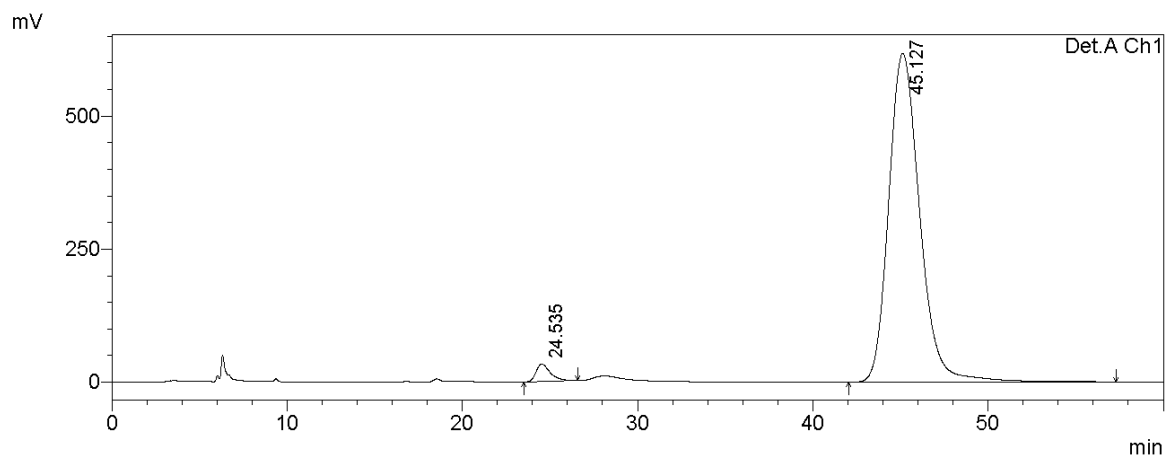

Detector A Ch1 254nm

| Peak# | Ret. Time | Area     | Height | Area %  | Height % |
|-------|-----------|----------|--------|---------|----------|
| 1     | 24.535    | 1858920  | 32684  | 2.387   | 5.027    |
| 2     | 45.127    | 76020666 | 617438 | 97.613  | 94.973   |
| Total |           | 77879586 | 650123 | 100.000 | 100.000  |

**(R)-2-Hydroxy-3-(2-nitro-1-(thiophen-2-yl)ethyl)naphthalene-1,4-dione (3t)**

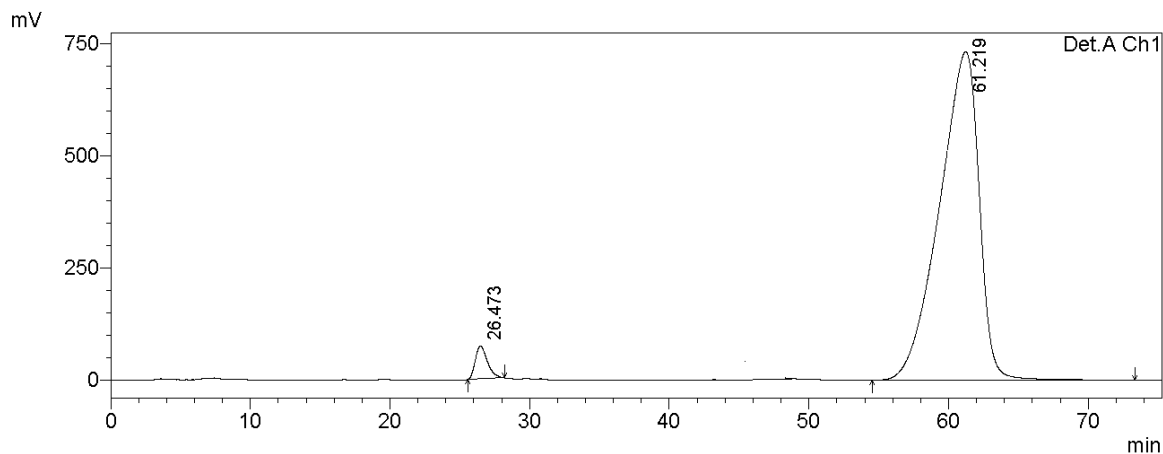

Detector A Ch1 254nm

| Peak# | Ret. Time | Area     | Height | Area %  | Height % |
|-------|-----------|----------|--------|---------|----------|
| 1     | 25.433    | 23299838 | 398432 | 49.528  | 71.133   |
| 2     | 56.176    | 23744006 | 161688 | 50.472  | 28.867   |
| Total |           | 47043843 | 560121 | 100.000 | 100.000  |

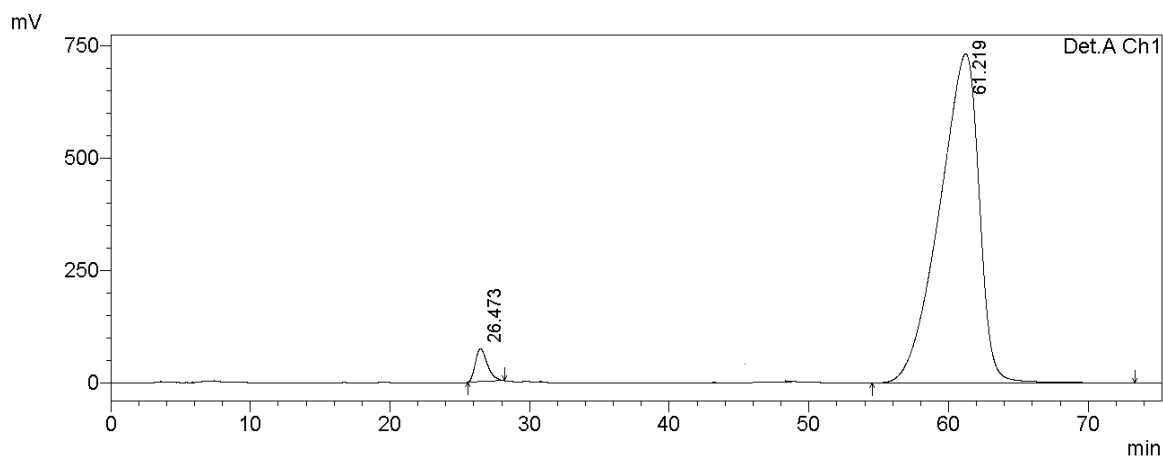

Detector A Ch1 254nm

| Peak# | Ret. Time | Area      | Height | Area %  | Height % |
|-------|-----------|-----------|--------|---------|----------|
| 1     | 26.473    | 4404380   | 73141  | 2.954   | 9.079    |
| 2     | 61.219    | 144690645 | 732457 | 97.046  | 90.921   |
| Total |           | 149095025 | 805598 | 100.000 | 100.000  |

**(S)-2-(1-Cyclohexyl-2-nitroethyl)-3-hydroxynaphthalene-1,4-dione (3u)**

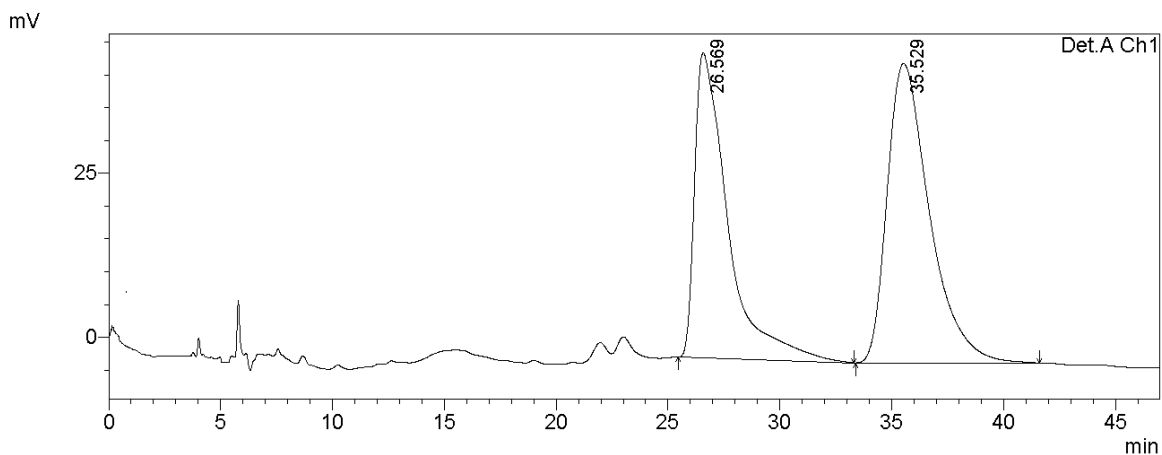

Detector A Ch1 254nm

| Peak# | Ret. Time | Area     | Height | Area %  | Height % |
|-------|-----------|----------|--------|---------|----------|
| 1     | 26.569    | 4802558  | 46619  | 44.413  | 50.503   |
| 2     | 35.529    | 6010759  | 45691  | 55.587  | 49.497   |
| Total |           | 10813317 | 92310  | 100.000 | 100.000  |

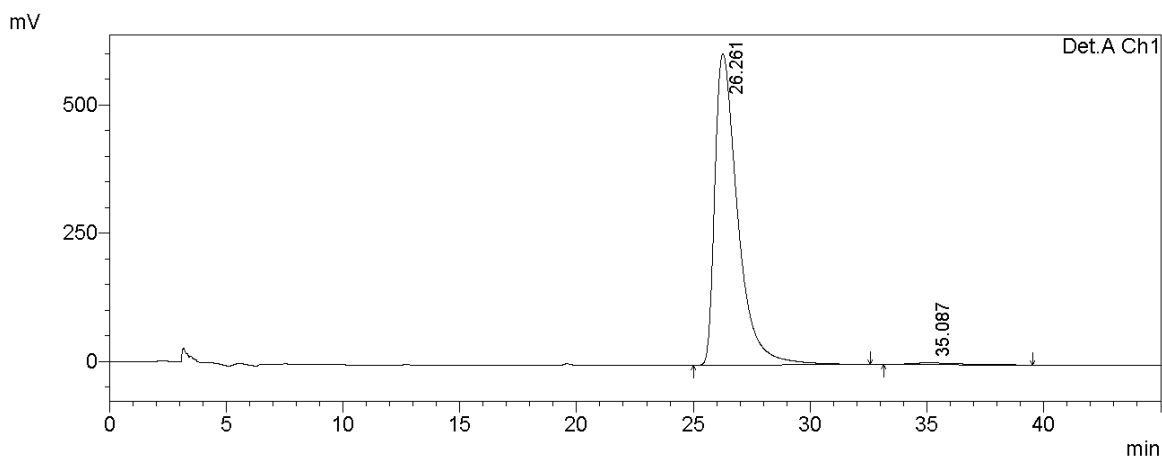

Detector A Ch1 254nm

| Peak# | Ret. Time | Area     | Height | Area %  | Height % |
|-------|-----------|----------|--------|---------|----------|
| 1     | 26.261    | 41415839 | 606387 | 98.732  | 99.413   |
| 2     | 35.087    | 531990   | 3583   | 1.268   | 0.587    |
| Total |           | 41947829 | 609970 | 100.000 | 100.000  |

**(S)-2-Hydroxy-3-(1-nitropentan-2-yl)naphthalene-1,4-dione (3v)**

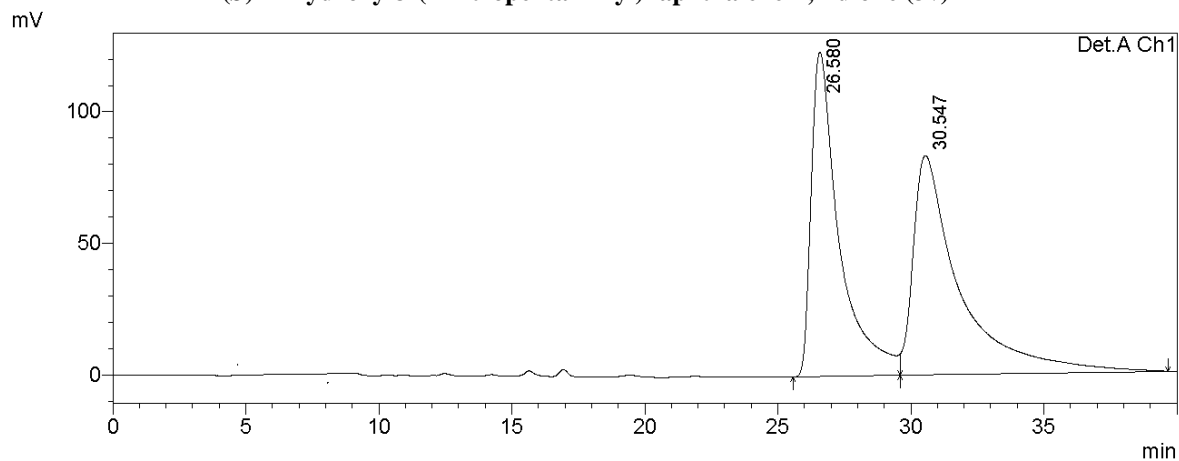

Detector A Ch1 254nm

| Peak# | Ret. Time | Area     | Height | Area %  | Height % |
|-------|-----------|----------|--------|---------|----------|
| 1     | 26.580    | 9038506  | 123331 | 47.093  | 59.665   |
| 2     | 30.547    | 10154558 | 83374  | 52.907  | 40.335   |
| Total |           | 19193064 | 206705 | 100.000 | 100.000  |

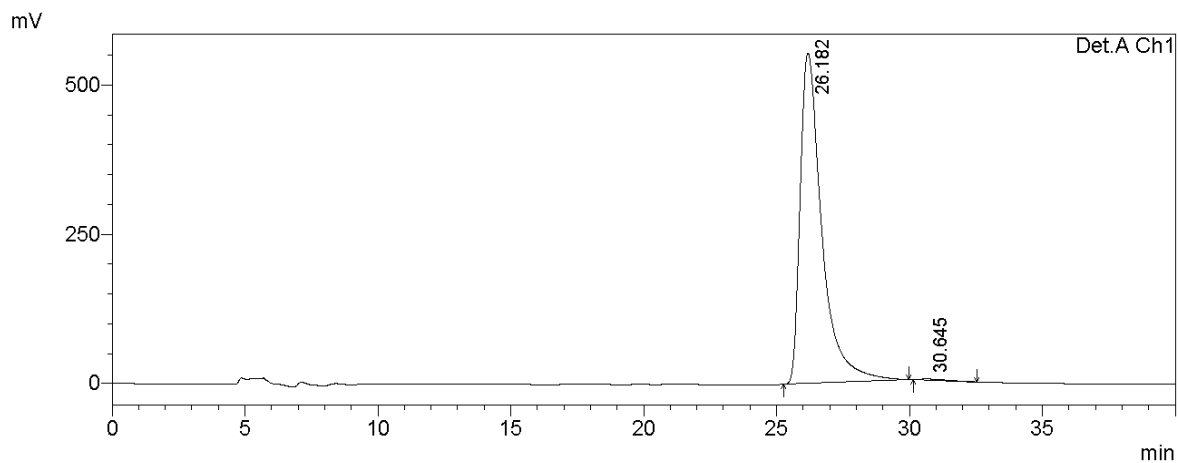

Detector A Ch1 254nm

| Peak# | Ret. Time | Area     | Height | Area %  | Height % |
|-------|-----------|----------|--------|---------|----------|
| 1     | 26.182    | 31435082 | 553306 | 99.621  | 99.708   |
| 2     | 30.645    | 119677   | 1619   | 0.379   | 0.292    |
| Total |           | 31554759 | 554925 | 100.000 | 100.000  |



**2-Hydroxy-3-((1R,2S)-2-nitro-1-phenylpropyl)naphthalene-1,4-dione (5a)**

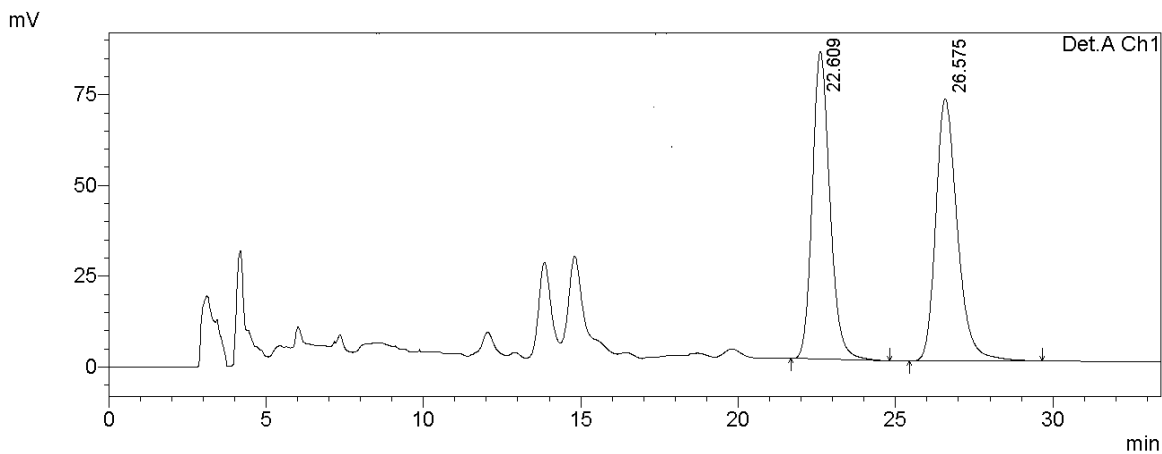

Detector A Ch1 220nm

| Peak# | Ret. Time | Area    | Height | Area %  | Height % |
|-------|-----------|---------|--------|---------|----------|
| 1     | 22.609    | 3300195 | 84745  | 48.860  | 53.995   |
| 2     | 26.575    | 3454245 | 72204  | 51.140  | 46.005   |
| Total |           | 6754439 | 156948 | 100.000 | 100.000  |

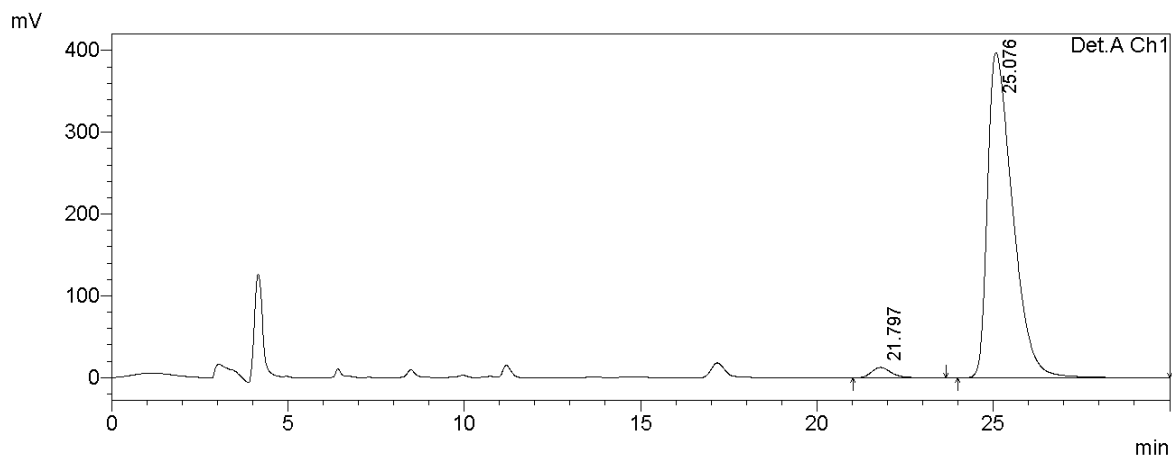

Detector A Ch1 220nm

| Peak# | Ret. Time | Area     | Height | Area %  | Height % |
|-------|-----------|----------|--------|---------|----------|
| 1     | 21.797    | 496452   | 12693  | 2.461   | 3.094    |
| 2     | 25.076    | 19678651 | 397538 | 97.539  | 96.906   |
| Total |           | 20175103 | 410231 | 100.000 | 100.000  |

**2-hydroxy-3-((1R,2S)-2-nitro-1-phenylbutyl)naphthalene-1,4-dione (5b)**

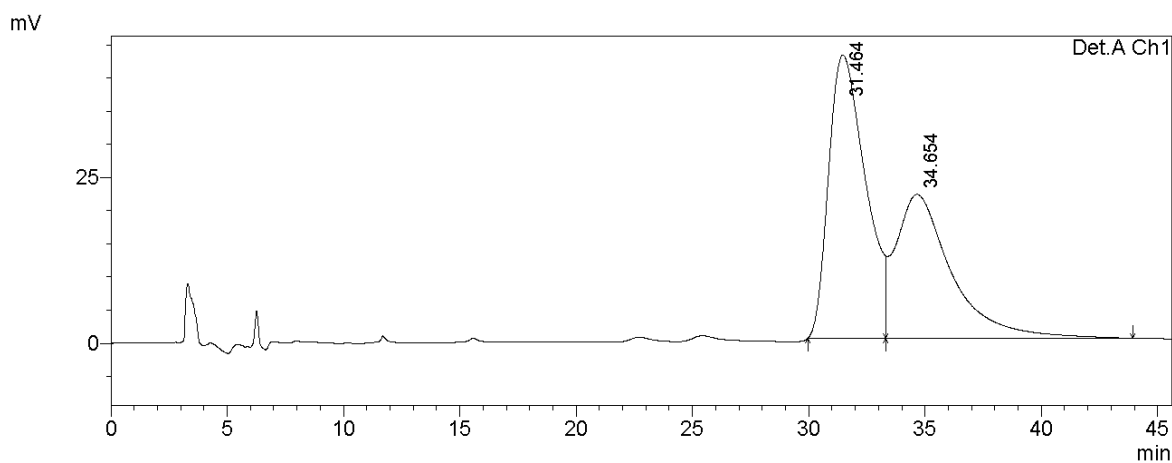

Detector A Ch1 254nm

| Peak# | Ret. Time | Area    | Height | Area %  | Height % |
|-------|-----------|---------|--------|---------|----------|
| 1     | 31.464    | 4720975 | 42746  | 56.500  | 66.302   |
| 2     | 34.654    | 3634716 | 21726  | 43.500  | 33.698   |
| Total |           | 8355691 | 64472  | 100.000 | 100.000  |

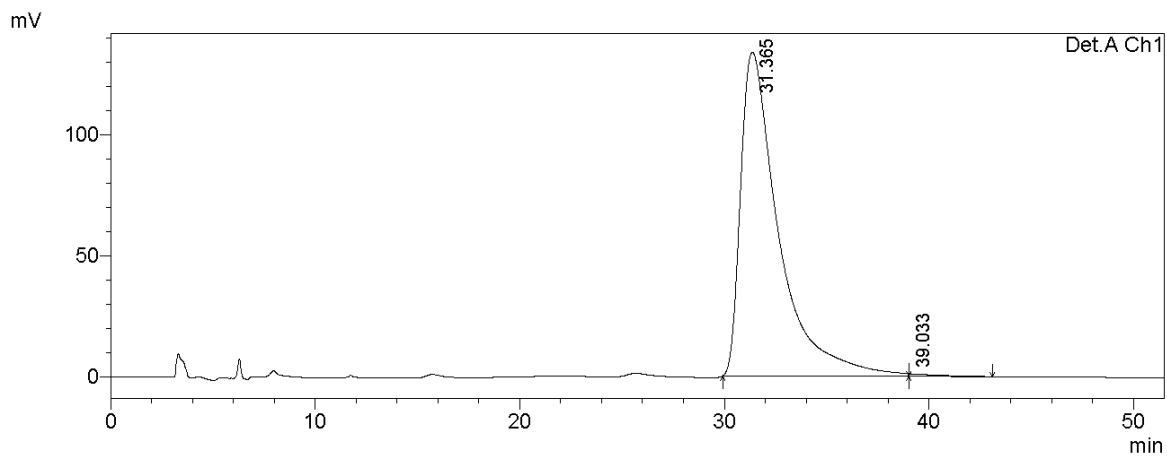

Detector A Ch1 254nm

| Peak# | Ret. Time | Area     | Height | Area %  | Height % |
|-------|-----------|----------|--------|---------|----------|
| 1     | 31.365    | 17282616 | 133587 | 99.397  | 99.156   |
| 2     | 39.033    | 104855   | 1138   | 0.603   | 0.844    |
| Total |           | 17387471 | 134724 | 100.000 | 100.000  |

**(S)-3-[1-(4-Methylphenyl)-2-nitroethyl]pentane-2,4-dione (7b)**

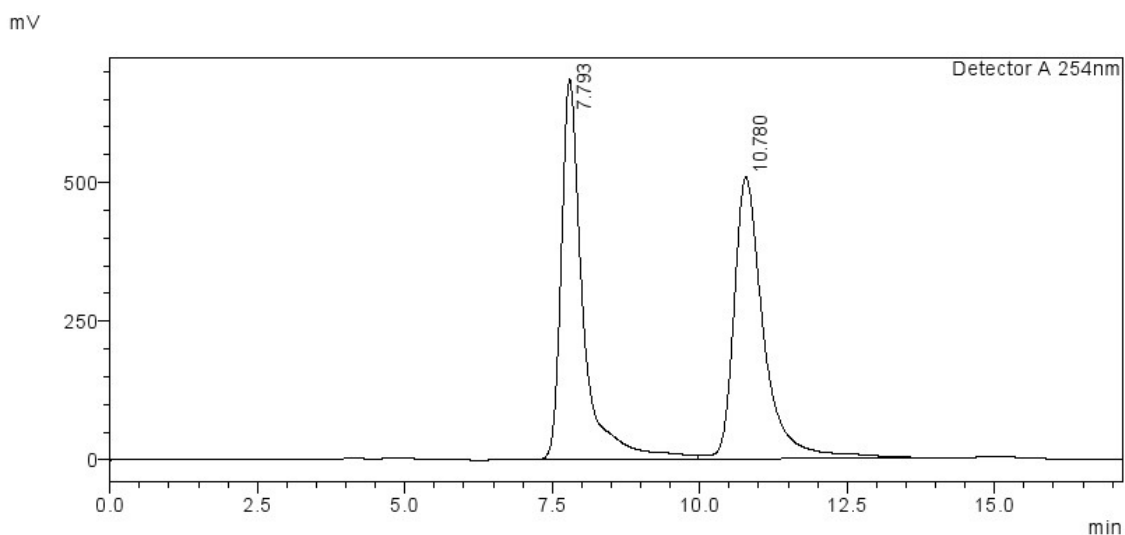

| Peak# | Ret. Time | Area     | Height  | Area%   |
|-------|-----------|----------|---------|---------|
| 1     | 7.793     | 17552919 | 686447  | 49.606  |
| 2     | 10.780    | 17831759 | 507377  | 50.394  |
| Total |           | 35384678 | 1193825 | 100.000 |

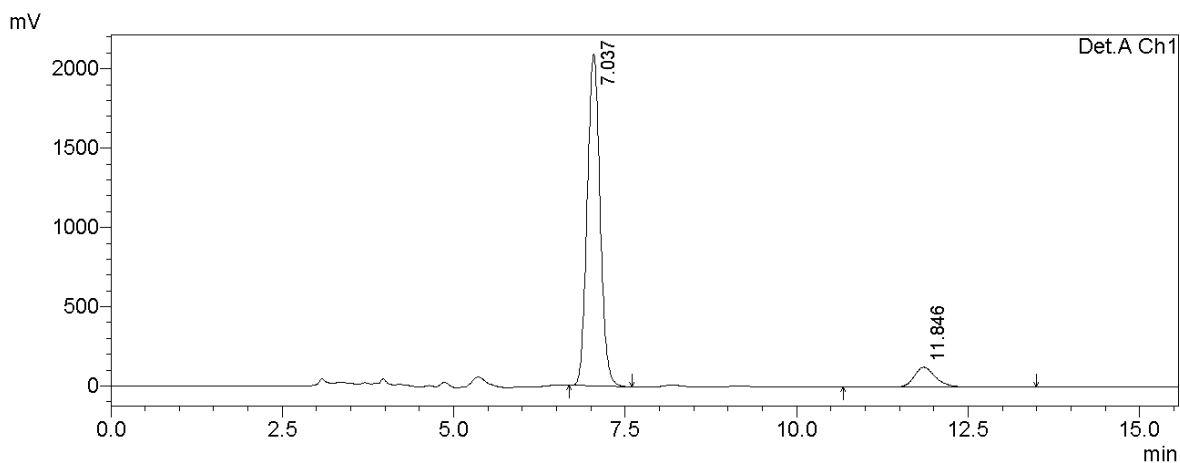

Detector A Ch1 230nm

| Peak# | Ret. Time | Area     | Height  | Area %  | Height % |
|-------|-----------|----------|---------|---------|----------|
| 1     | 7.037     | 27393422 | 2092612 | 90.893  | 94.332   |
| 2     | 11.846    | 2744823  | 125743  | 9.107   | 5.668    |
| Total |           | 30138244 | 2218356 | 100.000 | 100.000  |

**(S)-3-[1-(4-Bromophenyl)-2-nitroethyl]pentane-2,4-dione (7d)**

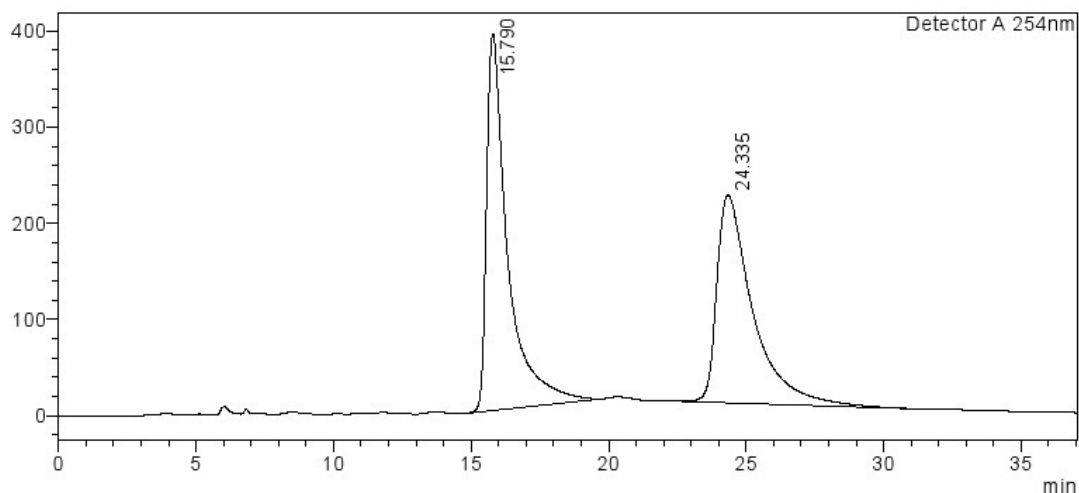

| Peak# | Ret. Time | Area     | Height | Area%   |
|-------|-----------|----------|--------|---------|
| 1     | 15.790    | 20857004 | 390975 | 51.622  |
| 2     | 24.335    | 19546447 | 215457 | 48.378  |
| Total |           | 40403451 | 606431 | 100.000 |

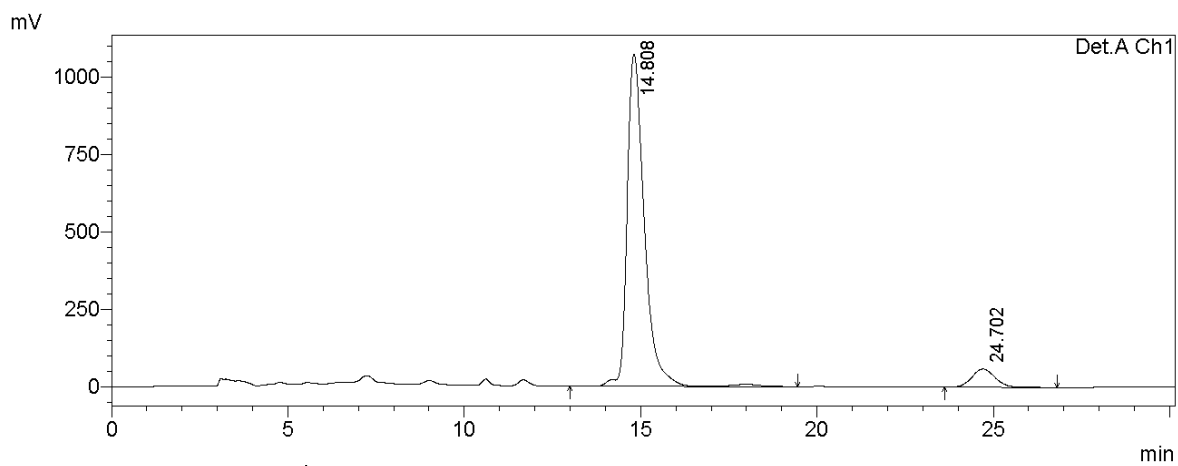

Detector A Ch1 210nm

| Peak# | Ret. Time | Area     | Height  | Area %  | Height % |
|-------|-----------|----------|---------|---------|----------|
| 1     | 14.808    | 36589952 | 1073383 | 93.246  | 94.829   |
| 2     | 24.702    | 2650213  | 58536   | 6.754   | 5.171    |
| Total |           | 39240165 | 1131919 | 100.000 | 100.000  |

(S)-3-[1-(Furan-2-yl)-2-nitroethyl]pentane-2,4-dione (7e)

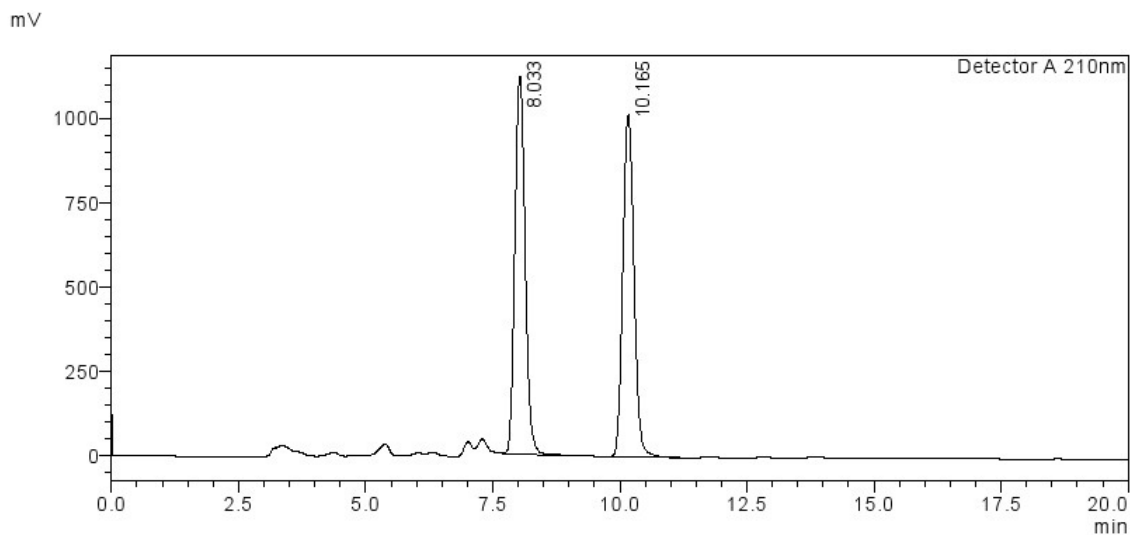

| Peak# | Ret. Time | Area     | Height  | Conc.  |
|-------|-----------|----------|---------|--------|
| 1     | 8.033     | 15766517 | 1119028 | 50.254 |
| 2     | 10.165    | 15607239 | 1014896 | 49.746 |
| Total |           | 31373757 | 2133924 |        |

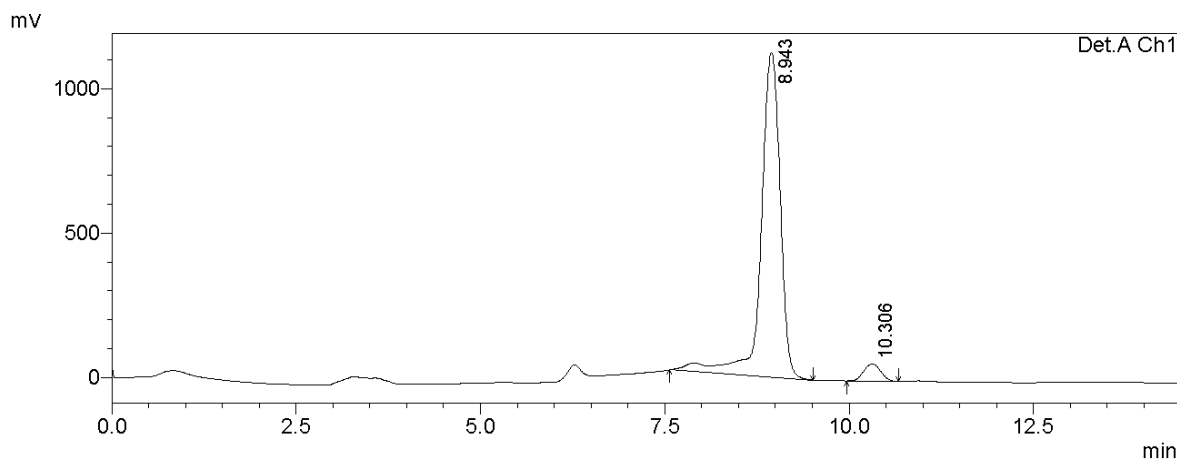

| Peak# | Ret. Time | Area     | Height  | Area %  | Height % |
|-------|-----------|----------|---------|---------|----------|
| 1     | 8.943     | 20586553 | 1124989 | 95.499  | 94.928   |
| 2     | 10.306    | 970358   | 60105   | 4.501   | 5.072    |
| Total |           | 21556911 | 1185094 | 100.000 | 100.000  |

**(S)-3-[1-(Thiophen-2-yl)-2-nitroethyl]pentane-2,4-dione(7f)**

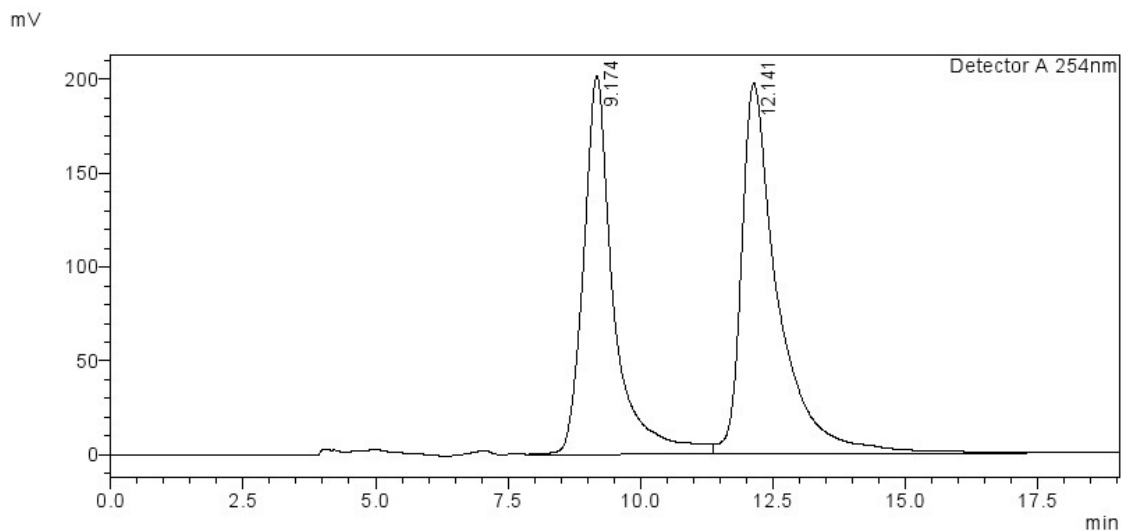

| Peak# | Ret. Time | Area     | Height | Area%   |
|-------|-----------|----------|--------|---------|
| 1     | 9.174     | 7960069  | 201483 | 45.742  |
| 2     | 12.141    | 9442192  | 197248 | 54.258  |
| Total |           | 17402261 | 398731 | 100.000 |

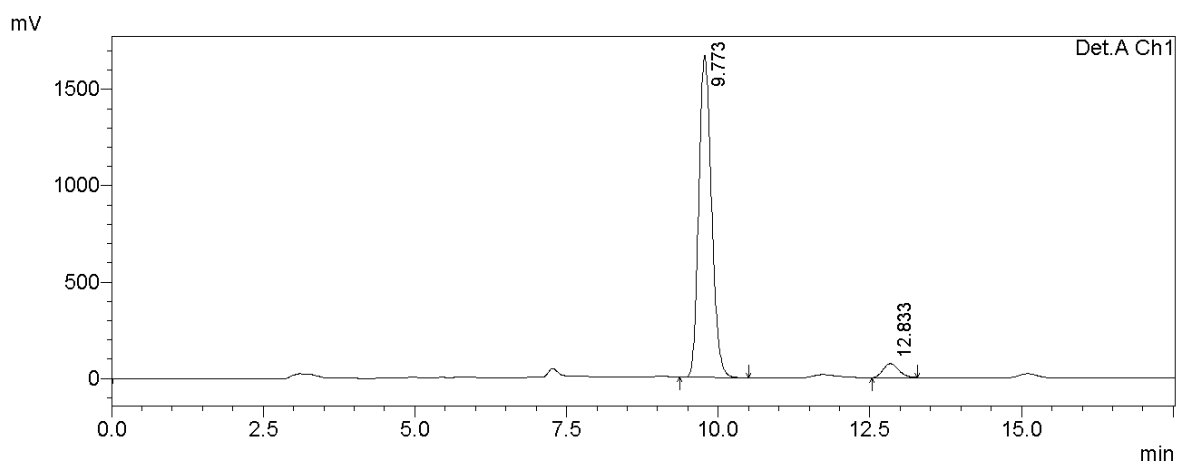

Detector A Ch1 210nm

| Peak# | Ret. Time | Area     | Height  | Area %  | Height % |
|-------|-----------|----------|---------|---------|----------|
| 1     | 9.773     | 24577069 | 1671969 | 95.020  | 95.837   |
| 2     | 12.833    | 1288060  | 72628   | 4.980   | 4.163    |
| Total |           | 25865129 | 1744597 | 100.000 | 100.000  |

(S)-3-[1-(4-Benzyloxyphenyl)-2-nitroethyl]pentane-2,4-dione (7i)

mV

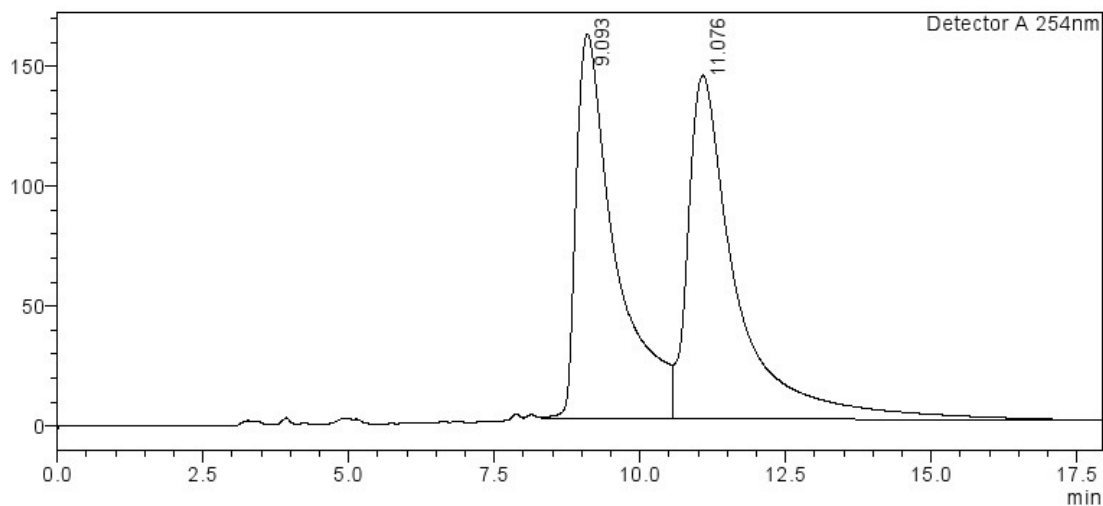

| Peak# | Ret. Time | Area     | Height | Area%   | Height% |
|-------|-----------|----------|--------|---------|---------|
| 1     | 9.093     | 7471877  | 160144 | 47.267  | 52.795  |
| 2     | 11.076    | 8336085  | 143189 | 52.733  | 47.205  |
| Total |           | 15807963 | 303334 | 100.000 | 100.000 |

mV

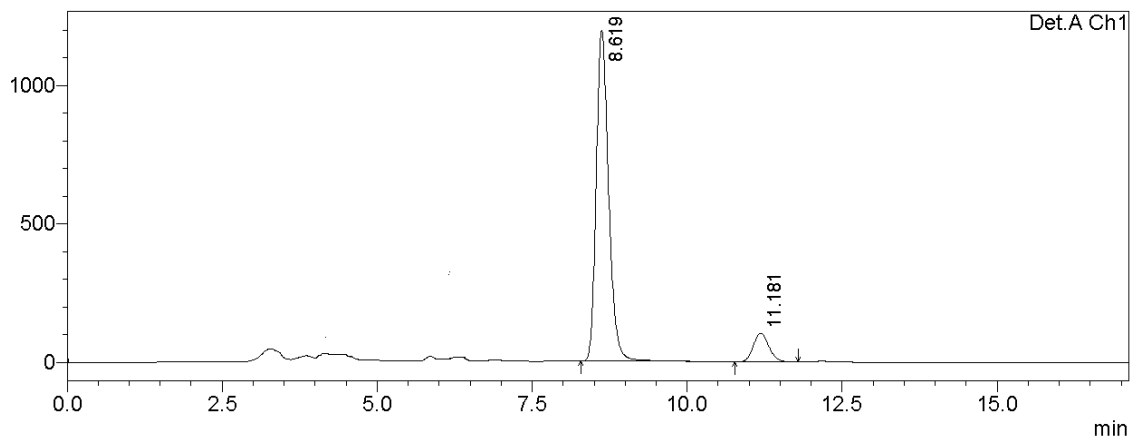

Detector A Ch1 210nm

| Peak# | Ret. Time | Area     | Height  | Area %  | Height % |
|-------|-----------|----------|---------|---------|----------|
| 1     | 8.619     | 16793519 | 1195105 | 90.265  | 92.016   |
| 2     | 11.181    | 1811224  | 103702  | 9.735   | 7.984    |
| Total |           | 18604743 | 1298807 | 100.000 | 100.000  |

(S)-3-[1-(2-Benzoyloxyphenyl)-2-nitroethyl]pentane-2,4-dione(7j)

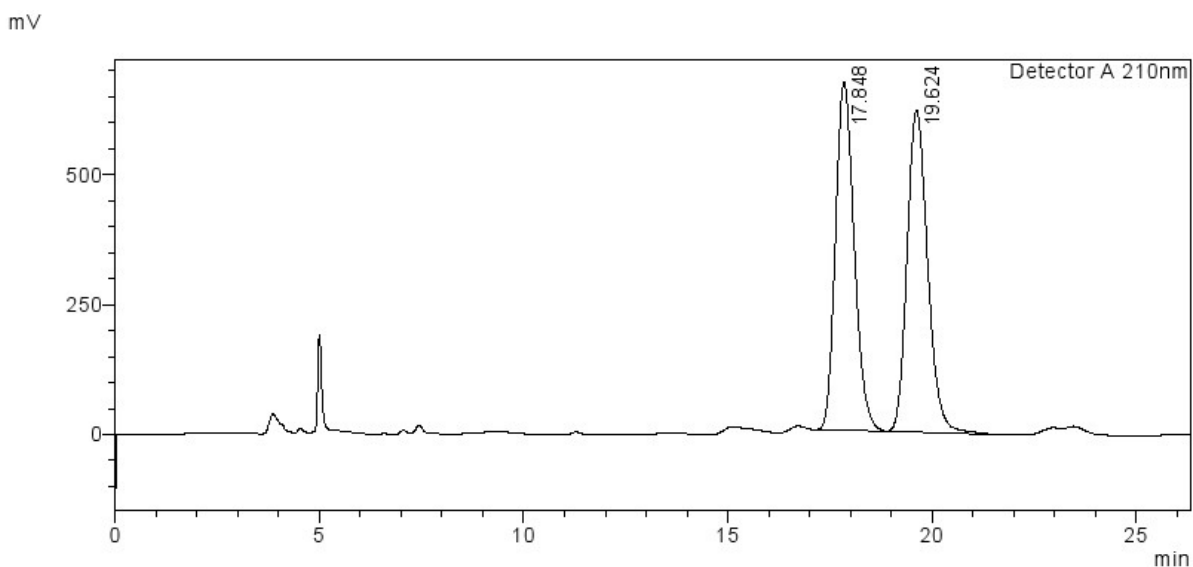

Detector A 210nm

| Peak# | Ret. Time | Area     | Height  | Area%   | Height% |
|-------|-----------|----------|---------|---------|---------|
| 1     | 17.848    | 21376383 | 670582  | 49.629  | 51.972  |
| 2     | 19.624    | 21695881 | 619684  | 50.371  | 48.028  |
| Total |           | 43072265 | 1290266 | 100.000 | 100.000 |

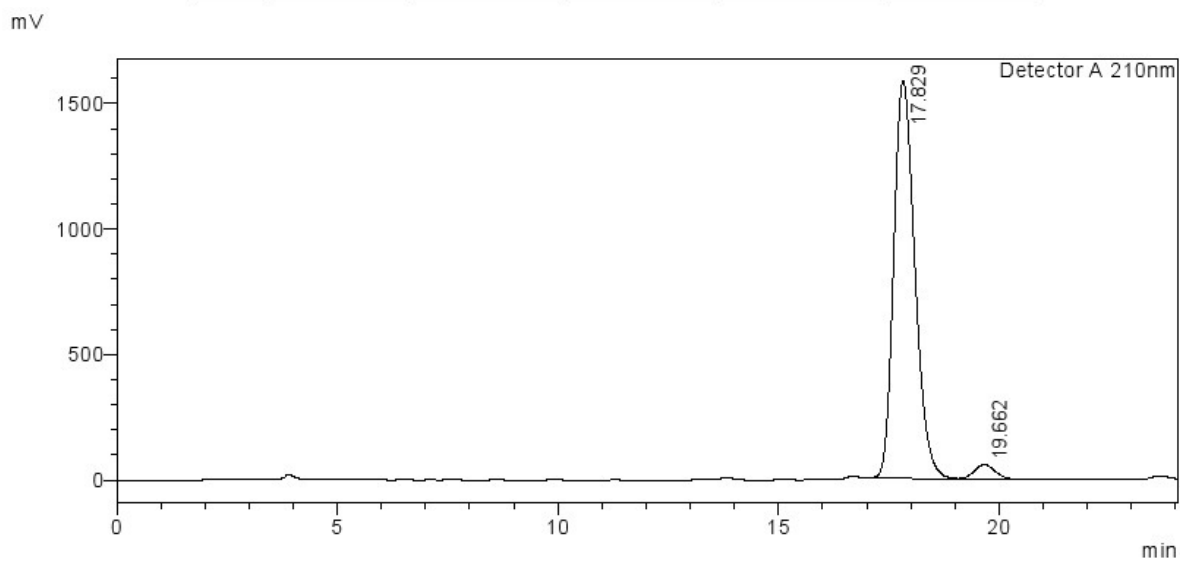

Detector A 210nm

| Peak# | Ret. Time | Area     | Height  | Area%   | Height% |
|-------|-----------|----------|---------|---------|---------|
| 1     | 17.829    | 52807450 | 1582702 | 96.482  | 96.485  |
| 2     | 19.662    | 1925661  | 57663   | 3.518   | 3.515   |
| Total |           | 54733112 | 1640365 | 100.000 | 100.000 |



**3-(*R*)-3-methyl-1-nitrobutan-2-yl)pentane-2,4-dione (7k)**

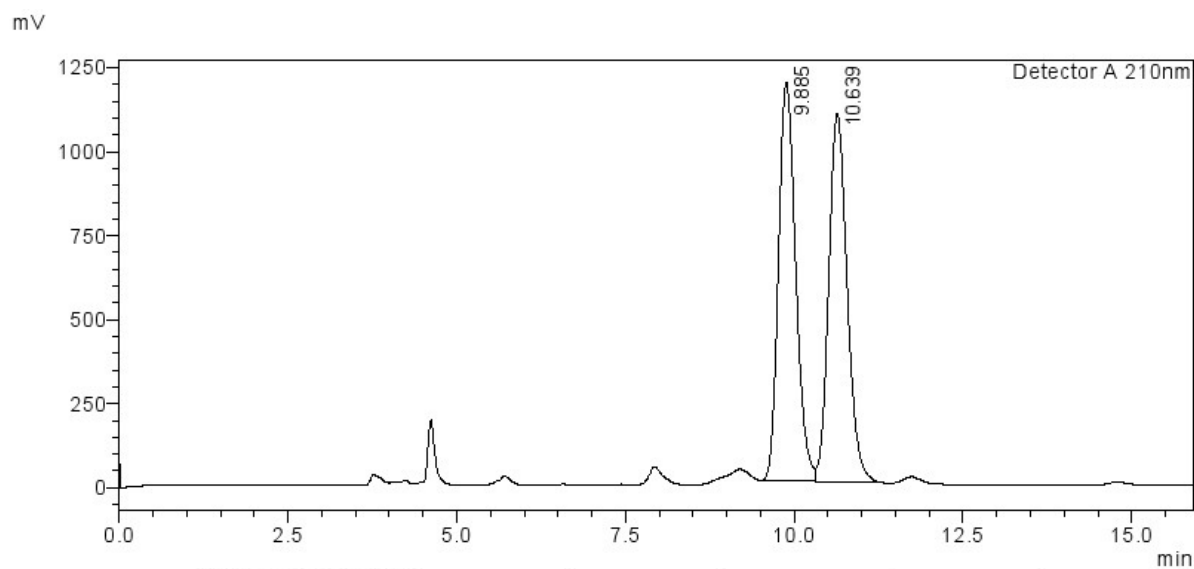

| Peak# | Ret. Time | Area     | Height  | Area%   | Height% |
|-------|-----------|----------|---------|---------|---------|
| 1     | 9.885     | 21116991 | 1186104 | 50.377  | 51.988  |
| 2     | 10.639    | 20801320 | 1095377 | 49.623  | 48.012  |
| Total |           | 41918311 | 2281481 | 100.000 | 100.000 |

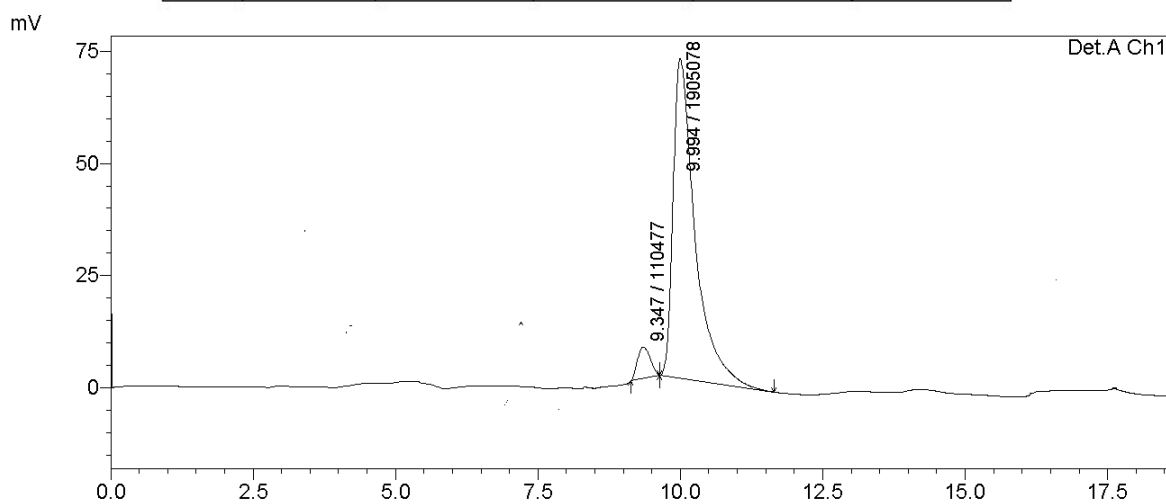

Detector A Ch1 210nm

| Peak# | Ret. Time | Area    | Height | Area %  | Height % |
|-------|-----------|---------|--------|---------|----------|
| 1     | 9.347     | 110477  | 7074   | 5.481   | 9.021    |
| 2     | 9.994     | 1905078 | 71339  | 94.519  | 90.979   |
| Total |           | 2015555 | 78413  | 100.000 | 100.000  |

**Dimethyl (S)-2-(2-nitro-1-phenylethyl)malonate (9a)**

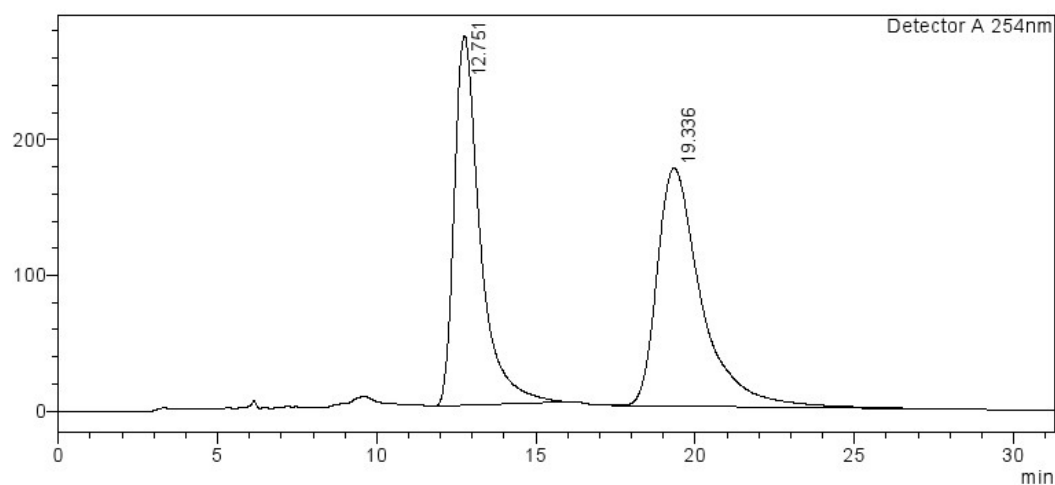

| Peak# | Ret. Time | Area     | Height | Area%   |
|-------|-----------|----------|--------|---------|
| 1     | 12.751    | 15321533 | 272064 | 47.470  |
| 2     | 19.336    | 16954813 | 175072 | 52.530  |
| Total |           | 32276346 | 447136 | 100.000 |

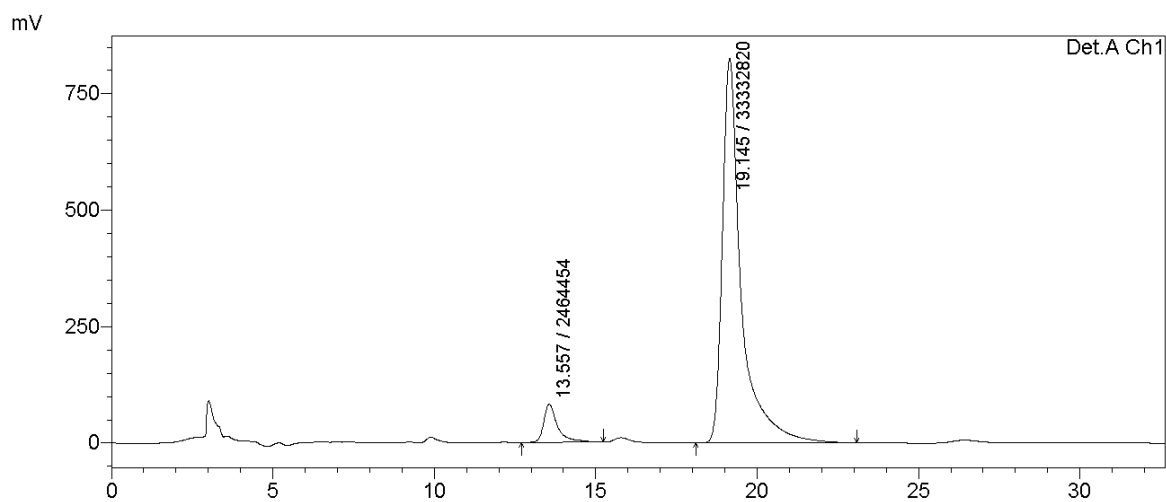

Detector A Ch1 210nm

| Peak# | Ret. Time | Area     | Height | Area %  | Height % |
|-------|-----------|----------|--------|---------|----------|
| 1     | 13.557    | 2464454  | 82557  | 6.884   | 9.087    |
| 2     | 19.145    | 33332820 | 825976 | 93.116  | 90.913   |
| Total |           | 35797274 | 908533 | 100.000 | 100.000  |

**Diethyl (S)-2-(2-nitro-1-phenylethyl)malonate (9b)**

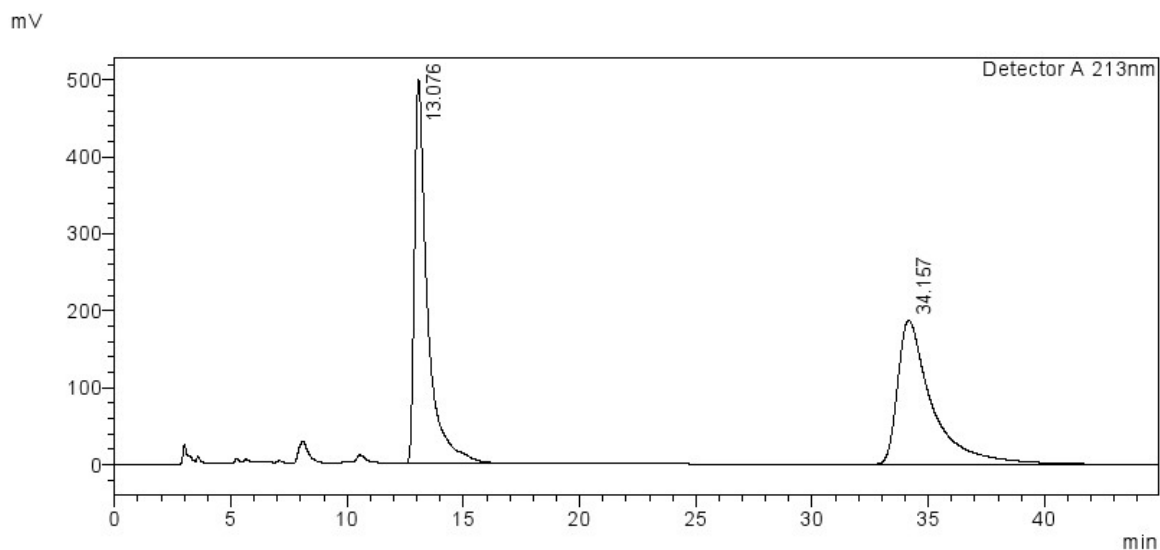

Detector A 213nm

| Peak# | Ret. Time | Area     | Area%   | Height% |
|-------|-----------|----------|---------|---------|
| 1     | 13.076    | 19405417 | 50.284  | 72.739  |
| 2     | 34.157    | 19186324 | 49.716  | 27.261  |
| Total |           | 38591741 | 100.000 | 100.000 |

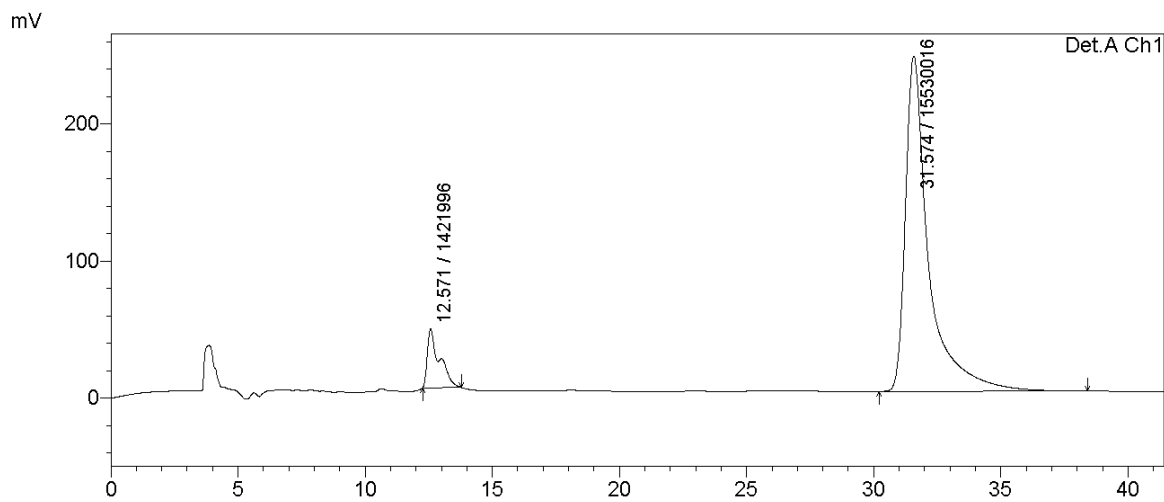

Detector A Ch1 213nm

| Peak# | Ret. Time | Area     | Height | Area %  | Height % |
|-------|-----------|----------|--------|---------|----------|
| 1     | 12.571    | 1421996  | 43115  | 8.388   | 14.981   |
| 2     | 31.574    | 15530016 | 244674 | 91.612  | 85.019   |
| Total |           | 16952012 | 287789 | 100.000 | 100.000  |

(S)-2-[(S)-2-nitro-1-phenylethyl]-1-phenylbutane-1,3-dione (9c):

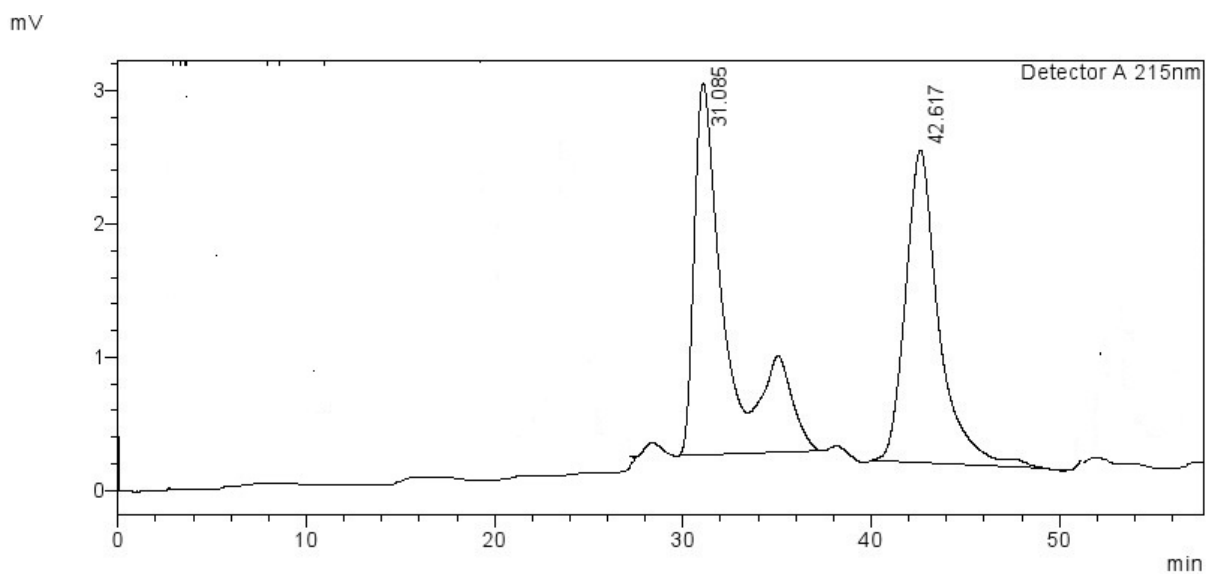

Detector A 215nm

| Peak# | Ret. Time | Area   | Height | Area%   | Height% |
|-------|-----------|--------|--------|---------|---------|
| 1     | 31.085    | 341819 | 2789   | 54.212  | 54.332  |
| 2     | 42.617    | 288701 | 2344   | 45.788  | 45.668  |
| Total |           | 630520 | 5133   | 100.000 | 100.000 |

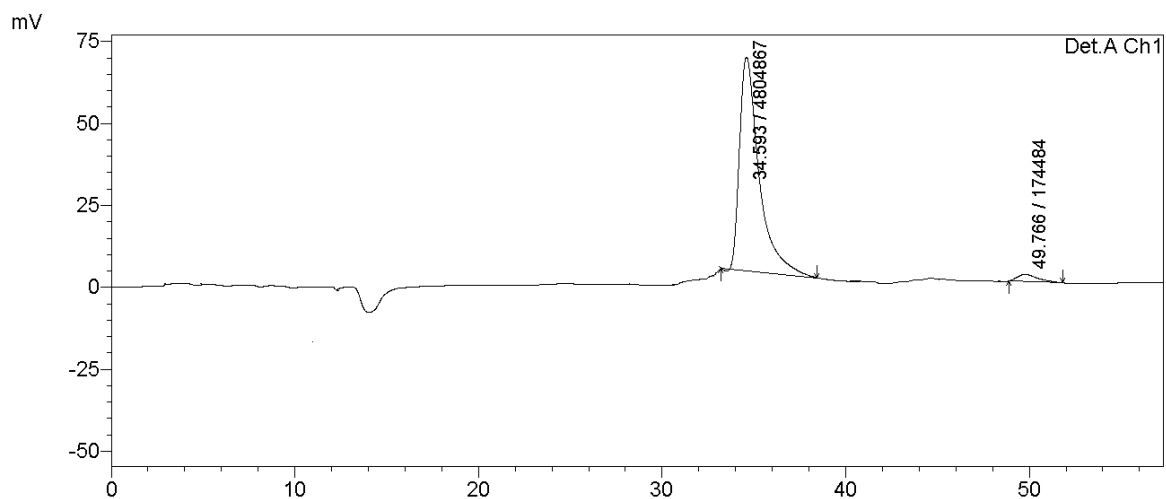

Detector A Ch1 215nm

| Peak# | Ret. Time | Area    | Height | Area %  | Height % |
|-------|-----------|---------|--------|---------|----------|
| 1     | 34.593    | 4804867 | 65144  | 96.496  | 96.777   |
| 2     | 49.766    | 174484  | 2169   | 3.504   | 3.223    |
| Total |           | 4979351 | 67314  | 100.000 | 100.000  |

**(R)-2-[(S)-2-nitro-1-phenylethyl]-1-phenylbutane-1,3-dione:**

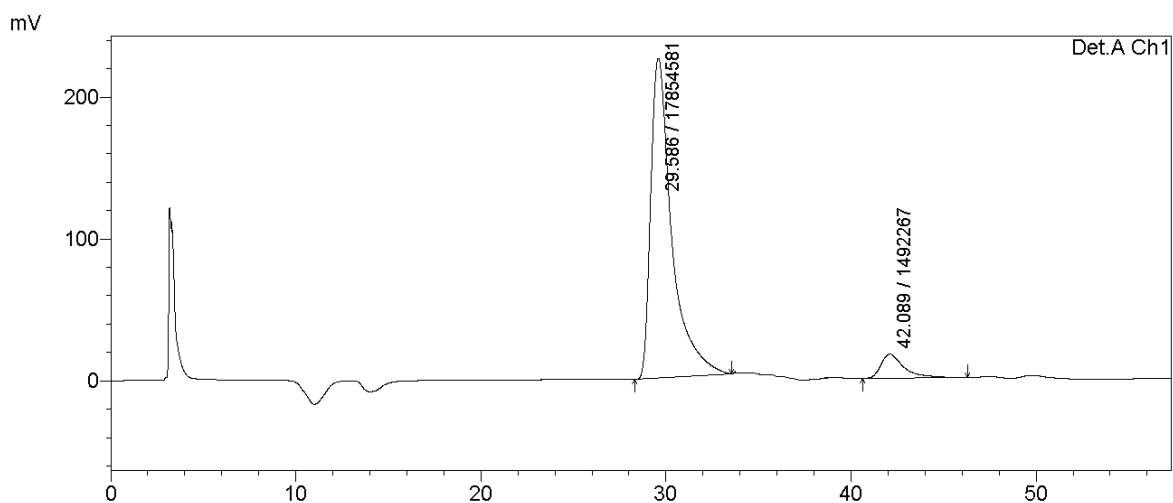

Detector A Ch1 215nm

| Peak# | Ret. Time | Area     | Height | Area %  | Height % |
|-------|-----------|----------|--------|---------|----------|
| 1     | 29.586    | 17854581 | 225514 | 92.287  | 93.021   |
| 2     | 42.089    | 1492267  | 16918  | 7.713   | 6.979    |
| Total |           | 19346848 | 242433 | 100.000 | 100.000  |
